# Supplementary material for: First Steps toward Harmonized Human Biomonitoring in Europe: Demonstration Project to Perform Human Biomonitoring on a European Scale
Source: PubMed Central journal article supplement (PMC4348748; doi:10.1289/ehp.1408616), 2014-12-11
Supplement: ehp.1408616.s001.508.pdf [file ehp.1408616.s001.508.pdf]

## **Supplemental Material**

### **First Steps toward Harmonized Human Biomonitoring in Europe: Demonstration Project to Perform Human Biomonitoring on a European Scale**

Elly Den Hond, Eva Govarts, Hanny Willems, Roel Smolders, Ludwine Casteleyn, Marike Kolossa-Gehring, Gerda Schwedler, Margarete Seiwert, Ulrike Fiddicke, Argelia Castaño, Marta Esteban, Jürgen Angerer, Holger M. Koch, Birgit K. Schindler, Ovnair Sepai, Karen Exley, Louis Bloemen, Milena Horvat, Lisbeth E. Knudsen, Anke Joas, Reinhard Joas, Pierre Biot, Dominique Aerts, Gudrun Koppen, Andromachi Katsonouri, Adamos Hadjipanayis, Andrea Krskova, Marek Maly, Thit A. Mørck, Peter Rudnai, Szilvia Kozepesy, Maurice Mulcahy, Rory Mannion, Arno C. Gutleb, Marc E. Fischer, Danuta Ligocka, Marek Jakubowski, M. Fátima Reis, Sónia Namorado, Anca Elena Gurzau, Ioana-Rodica Lupsa, Katarina Halzlova, Michal Jajcaj, Darja Mazej, Janja Snoj Tratnik, Ana López, Estrella Lopez, Marika Berglund, Kristin Larsson, Andrea Lehmann, Pierre Crettaz, and Greet Schoeters

## Details on Statistical Analysis

### Methods

#### *Study protocol*

The list of ethics committees is given in Supplemental Material, Table S1.

**Table S1.** Overview of ethics committee per country.

| <b>Country</b>       | <b>Ethics committee</b>                                                                            |
|----------------------|----------------------------------------------------------------------------------------------------|
| BE - Belgium         | Ethics Committee of the University of Antwerp                                                      |
| CH - Switzerland     | Kantonale Ethikkommission Bern (KEK)                                                               |
| CY - Cyprus          | Cyprus National Bioethics Committee (CNBC).                                                        |
| CZ - Czech Republic  | Ethical Committee of the NIPH                                                                      |
| DE - Germany         | Ethics Committee of the Ruhr-University, Bochum                                                    |
| DK - Denmark         | De Videnskabsetiske Komiteer for Region Hovedstaden                                                |
| ES - Spain           | Comité de Ética de la Investigación y Bienestar Animal                                             |
| HU - Hungary         | Medical Research Council, Scientific and Ethical Committee                                         |
| IE- Ireland          | Royal College of Surgeons Research and Ethics Committee                                            |
| LU - Luxembourg      | Comité d'Ethique de Recherche (CNER)                                                               |
| PL - Poland          | Bioethical Committee at the Nofer Institute of Occupational Medicine in Lodz                       |
| PT - Portugal        | Comissão de Ética Centro Hospitalar Lisboa Norte / Faculdade de Medicina de Lisboa                 |
| RO - Romania         | Ethics Committee of the Environmental Health Center (EHC) for the Institutional Review Board (IRB) |
| SE - Sweden          | Regionala Etixprövningsnämnden (The regional ethical review board), Stockholm                      |
| SI - Slovenia        | Komisija Republike Slovenije za medicinsko etiko / National Medical Ethics Committee               |
| SK - Slovak Republic | Ethical Committee of the Health Authority of the Slovak Republic                                   |
| UK - United Kingdom  | Riverside Research Ethic Committee, NHS Brighton & Hove.                                           |

### ***Identification of determinants of exposure***

For each biomarker of exposure the relation with possible determining factors was studied by univariate and multiple regression techniques. All analyses were done separately for the mothers and the children.

Confounders and covariates are listed in Supplemental Material, Table S1. Confounders are *a priori* defined variables that are known to be related to the biomarker. Covariates are possible determinants; its relationship with the biomarker is tested within the study group. All confounders and covariates were put in the models as categorical variables.

Both for univariate and for multiple models, linear mixed models were used instead of the ordinary linear regression models. Hence, the clustered design was taken into account in mixed effect analysis. Within a country, participants were recruited in a similar way, and thus the mothers (or children) within one country may be considered as dependent measures. Mothers (or children) from one country may have ‘more identical’ biomarker values than mothers (or children) from another country. This dependency between the biomarker values could be introduced into a model by a random effect. The correlation between the biomarker values within a country was estimated by the model. The intraclass correlation coefficient gives the proportion of variability in the biomarker values due to the variability between countries. The introduction of the random effects into the model will change the confidence intervals of the estimates. Explanatory variables of interest were included in the model as fixed effects.

First, univariate models were developed for all covariates. In a second step, multiple regression models were built including those determining factors which are significant at the 0.25

significance level in the univariate analyses. The confounders are fixed into the model. Important determining factors were identified by stepwise selection procedures (this is a combination of forward and backward selection procedures) in which we set  $p < 0.05$  to stay in the model. As such a final linear mixed model is obtained.

Quantitative relationships between the covariates and the biomarkers were calculated from the estimates of the linear mixed model, assuming that, when quantifying the relation of one covariate with the biomarker, all other covariates in the model are fixed at the population mean.

The problem of multicollinearity, that is the existence of a high degree of linear correlation amongst two or more explanatory variables in a regression model (Neter et al. 1996) was examined. Multicollinearity makes it difficult to separate the effects of the explanatory variables on the dependent variable. In the presence of multicollinearity, the estimate of one variable's impact on Y while controlling for the others tend to be less precise than if the predictors were uncorrelated with one another. Spearman correlation coefficients between the different explanatory variables were calculated; highly correlated variables were not included in the same model. The effects of multicollinearity were analyzed using variance inflation factors. If the variance inflation factor was larger than 10 then multicollinearity was concluded (Fox 1991).

**Table S2.** List of confounders (Conf) and covariates (Cov) to be examined in relation with biomarkers of exposure.

| Subgroups/strata                  | Mercury in hair (µg/g) | Urinary cadmium (µg/L) | Urinary cotinine (µg/L) | Urinary phthalate metabolites (µg/L) |
|-----------------------------------|------------------------|------------------------|-------------------------|--------------------------------------|
| Creatinine                        | NA                     | Conf                   | Conf                    | Conf                                 |
| Urinary volume                    | NA                     | Cov                    | Cov                     | Cov                                  |
| Time period of urine collection   | NA                     | Cov                    | Cov                     | Cov                                  |
| Morning urine                     | NA                     | Cov                    | Cov                     | Cov                                  |
| Age                               | Conf                   | Conf                   | Conf                    | Conf                                 |
| Body-mass index                   | NA                     | NA                     | NA                      | Cov                                  |
| Smoking                           | NA                     | Conf <sup>a</sup>      | Cov                     | NA                                   |
| ETS                               | NA                     | Cov                    | Cov                     | NA                                   |
| Food consumption (specific items) | Cov                    | Cov                    | NA                      | Cov                                  |
| Water consumption                 | Cov                    | Cov                    | NA                      | Cov                                  |
| Neighborhood of industry (spec.)  | Cov                    | Cov                    | NA                      | Cov                                  |
| Fuel sources                      | NA                     | Cov                    | NA                      | NA                                   |
| House renovation /redecorating    | NA                     | Cov                    | NA                      | Cov                                  |
| PVC in house                      | NA                     | NA                     | NA                      | Cov                                  |
| Traffic exposure                  | NA                     | Cov                    | NA                      | Cov                                  |
| Soldering                         | Cov                    | Cov                    | NA                      | NA                                   |
| Amalgam fillings                  | Cov                    | NA                     | NA                      | NA                                   |
| Skin bleaching                    | Cov                    | NA                     | NA                      | NA                                   |
| Broken mercury thermometer        | Cov                    | NA                     | NA                      | NA                                   |
| Broken energy-saving lamps        | Cov                    | NA                     | NA                      | NA                                   |
| Hair treatment                    | Cov                    | NA                     | NA                      | NA                                   |
| Use of personal care products     | NA                     | NA                     | NA                      | Cov                                  |
| Educational level                 | Cov                    | Cov                    | Cov                     | Cov                                  |
| Rural / urban                     | Cov                    | Cov                    | Cov                     | Cov                                  |
| Gender                            | Conf                   | Conf                   | Conf                    | Conf                                 |
| Contact with toys                 | NA                     | NA                     | NA                      | Cov                                  |
| Use of gloves                     | NA                     | NA                     | NA                      | Cov                                  |

Conf: confounder; Cov: covariate; NA: not applicable; ETS: environmental tobacco smoke;

PVC: polyvinyl chloride

<sup>a</sup>Initially, smoking was a confounder in the models for Cd in children but this variable was not retained as confounder since there were no smokers in the children's study group.

The assumption of normality was checked with informal diagnostic residual plots and the Kolmogorov–Smirnov test (Neter et al. 1996). Influence diagnostics (e.g. restricted likelihood distance, Cook’s D, CovRatio) were used to quantify the influence of one or more observations by computing parameters estimates based on all data points, removing the cases in question from the data, refitting the model, and computing statistics based on the change between full-data and reduced-data estimates.

The models to explore the relation between possible determining factors were built on the central database, without any weighing. As a sensitivity analysis weights were added to the final model in such a way that each country contributed equally (except Luxembourg and Cyprus for half) to the model. Results with and without weighing were compared.

### ***Comparison of results between countries***

European exposure values were calculated as geometric mean (with 95% confidence interval). These exposure values were calculated separately for mothers and children. For urinary markers, exposure values were calculated in  $\mu\text{g/L}$  and in  $\mu\text{g/g}$  creatinine. Exposure values were weighted so that all countries contribute equally to the exposure value. All countries were assigned a weight as such that they contribute for 120 individuals to the exposure value, only Luxembourg and Cyprus contributed for half (60 individuals). Exposure values were both calculated on the raw data as adjusted for the specific confounders of the biomarker (Supplemental Material, Table S1).

The level of the biomarkers in each country was compared with the European exposure values. Hence, it is tested whether mean levels of a biomarker in a country were significantly above or below the pilot reference mean at the 5% significance level, both for the unadjusted values as

after adjustment for confounders. The natural logarithm of the biomarker values was used for the statistical analyses. In order to test the overall differences between the 17 countries, the significance of country was tested in a multiple regression models (based on a F-test), either with or without inclusion of the confounders in the model. If the null hypothesis was not rejected (i.e. there were no significant differences between the countries at the 5% significance level), no further testing was done. If the null hypothesis was confirmed, further testing was done by comparing the mean in each country with the pilot reference mean. The significance of these differences was determined by multiple regression models, either with or without inclusion of confounders.

## **References**

- Fox, J. 1991. Regression Diagnostics: an Introduction. Ed. Sage. CA.
- Neter J, Kutner M, Nachtsheim C, Wasserman W. 1996. Applied Linear Statistical Models. Ed. McGraw-Hill/Irwin. New York: (4<sup>th</sup> edition).

## **1. Descriptive statistics**

The descriptive statistics for all biomarkers are presented in Supplemental Material, Table S3.

The data are given in  $\mu\text{g/g}$  hair for mercury and both in  $\mu\text{g/L}$  and  $\mu\text{g/g}$  creatinine for urinary markers, separately for children and mothers.

Geometric means and percentiles are calculated on the basis of the 'raw' data, i.e. without weighing or correction for clustering, and without adjustment for confounders or covariates.



**Table S3.** Descriptive statistics for biomarkers of exposure in 17 European countries, separately for mothers and children.

| Biomarker                            | N    | % >LOQ | GM (95%CI)           | min.  | P10   | P25   | P50   | P75   | P90   | P95   | max.  |
|--------------------------------------|------|--------|----------------------|-------|-------|-------|-------|-------|-------|-------|-------|
| <b>Children</b>                      |      |        |                      |       |       |       |       |       |       |       |       |
| Mercury in hair (µg/g)               | 1836 | 85.9   | 0.143 (0.135, 0.152) | 0.005 | 0.030 | 0.065 | 0.144 | 0.352 | 0.818 | 1.289 | 7.100 |
| Cadmium in urine (µg/L)              | 1698 | 70.1   | 0.067 (0.064, 0.071) | 0.005 | 0.020 | 0.032 | 0.080 | 0.131 | 0.220 | 0.270 | 0.640 |
| Cadmium in urine (µg/g crt)          | 1698 | 70.1   | 0.065 (0.062, 0.068) | 0.003 | 0.017 | 0.038 | 0.075 | 0.123 | 0.181 | 0.233 | 1.037 |
| Cotinine in urine (µg/L)             | 1818 | 57.6   | 0.82 (0.77, 0.87)    | 0.05  | 0.24  | 0.35  | 0.60  | 1.53  | 5.10  | 11.00 | 269.8 |
| Cotinine in urine (µg/g crt)         | 1818 | 57.6   | 0.79 (0.74, 0.83)    | 0.03  | 0.19  | 0.32  | 0.62  | 1.61  | 4.98  | 10.24 | 152   |
| DEHP metabolites in urine (µg/L)     | 1816 | 85.6   | 48.6 (46.8, 50.5)    | 1.84  | 17.0  | 28.4  | 46.8  | 80.9  | 141.0 | 213.4 | 1356  |
| DEHP metabolites in urine (µg/g crt) | 1816 | 85.6   | 46.8 (45.2, 48.5)    | 2.04  | 18.7  | 28.7  | 45.5  | 73.1  | 120.3 | 170.1 | 3616  |
| MEP in urine (µg/L)                  | 1816 | 98.0   | 35.8 (34.0, 37.7)    | 0.71  | 9.0   | 16.4  | 33.0  | 69.5  | 160.0 | 254.3 | 6858  |
| MEP in urine (µg/g crt)              | 1816 | 98.0   | 34.4 (32.7, 36.2)    | 0.94  | 9.9   | 16.7  | 29.3  | 65.7  | 141.8 | 242.4 | 4017  |
| MBzP in urine (µg/L)                 | 1816 | 95.2   | 7.4 (7.0, 7.7)       | 0.1   | 2.3   | 3.5   | 7.0   | 14.0  | 27.8  | 40.1  | 929   |
| MBzP in urine (µg/g crt)             | 1816 | 95.2   | 7.1 (6.8, 7.4)       | 0.18  | 2.1   | 3.5   | 6.6   | 12.9  | 26.0  | 42.2  | 603   |
| MnBP in urine (µg/L)                 | 1355 | 99.9   | 35.8 (34.3, 37.4)    | 2.0   | 12.5  | 21.0  | 36.0  | 60.3  | 98.0  | 139.0 | 865   |
| MnBP in urine (µg/g crt)             | 1355 | 99.9   | 34.6 (33.2, 36.0)    | 0.83  | 14.2  | 21.3  | 33.9  | 54.7  | 88.1  | 131.3 | 883   |
| MiBP in urine (µg/L)                 | 1355 | 99.8   | 47.5 (45.3, 49.7)    | 2.3   | 16.0  | 26.0  | 47.9  | 83.0  | 135.0 | 199.9 | 1940  |
| MiBP in urine (µg/g crt)             | 1355 | 99.8   | 45.9 (43.9, 47.9)    | 1.7   | 17.0  | 27.6  | 44.8  | 75.2  | 125.9 | 167.6 | 1634  |
| <b>Mothers</b>                       |      |        |                      |       |       |       |       |       |       |       |       |
| Mercury in hair (µg/g)               | 1839 | 90.5   | 0.230 (0.217, 0.244) | 0.005 | 0.051 | 0.099 | 0.231 | 0.538 | 1.28  | 1.89  | 9.66  |
| Cadmium in urine (µg/L)              | 1685 | 93.8   | 0.218 (0.209, 0.227) | 0.005 | 0.076 | 0.130 | 0.230 | 0.390 | 0.624 | 0.820 | 2.780 |
| Cadmium in urine (µg/g crt)          | 1685 | 93.8   | 0.193 (0.187, 0.200) | 0.003 | 0.077 | 0.128 | 0.200 | 0.311 | 0.467 | 0.592 | 2.459 |
| Cotinine in urine (µg/L)             | 1800 | 62.4   | 2.95 (2.56, 3.40)    | 0.05  | 0.24  | 0.35  | 0.80  | 4.90  | 1237  | 1861  | 4991  |
| Cotinine in urine (µg/g crt)         | 1800 | 62.4   | 2.62 (2.27, 3.02)    | 0.02  | 0.19  | 0.33  | 0.74  | 4.28  | 927   | 1591  | 5145  |
| DEHP metabolites in urine (µg/L)     | 1800 | 84.3   | 30.2 (29.0, 31.5)    | 1.87  | 9.7   | 16.3  | 29.8  | 53.2  | 93.0  | 132.0 | 2721  |
| DEHP metabolites in urine (µg/g crt) | 1800 | 84.3   | 26.8 (25.9, 27.8)    | 1.80  | 10.7  | 16.5  | 25.5  | 41.7  | 70.2  | 104.3 | 1540  |
| MEP in urine (µg/L)                  | 1800 | 98.3   | 49.6 (46.7, 52.6)    | 1.3   | 9.8   | 19.5  | 46.0  | 114.6 | 259   | 448   | 6761  |
| MEP in urine (µg/g crt)              | 1800 | 98.3   | 44.0 (41.7, 46.5)    | 1.26  | 10.3  | 18.2  | 40.7  | 92.1  | 209   | 342   | 3259  |
| MBzP in urine (µg/L)                 | 1800 | 91.8   | 4.7 (4.5, 4.9)       | 0.1   | 1.4   | 2.5   | 4.5   | 8.7   | 18.0  | 25.9  | 698   |
| MBzP in urine (µg/g crt)             | 1800 | 91.8   | 4.2 (4.0, 4.4)       | 0.128 | 1.4   | 2.3   | 4.0   | 7.0   | 13.7  | 20.8  | 433   |
| MnBP in urine (µg/L)                 | 1347 | 99.4   | 25.0 (23.9-26.1)     | 1.68  | 8.9   | 14.9  | 24.5  | 41.4  | 68.0  | 97.0  | 2800  |
| MnBP in urine (µg/g crt)             | 1347 | 99.4   | 22.3 (21.5, 23.2)    | 0.88  | 9.8   | 14.7  | 22.0  | 33.9  | 51.6  | 67.6  | 2059  |
| MiBP in urine (µg/L)                 | 1347 | 99.4   | 31.6 (30.3-33.1)     | 2.45  | 11.0  | 18.0  | 31.0  | 56.0  | 89.0  | 124   | 702   |
| MiBP in urine (µg/g crt)             | 1347 | 99.4   | 28.3 (27.2, 29.4)    | 0.98  | 12.7  | 17.8  | 27.7  | 44.8  | 69.4  | 94.3  | 347   |

N: number; LOQ: limit of quantification; GM: geometric mean; 95% CI: 95% confidence interval; min.: minimum; P: percentile; max.: maximum;

DEHP: di(2-ethylhexyl)phthalate; MEP: mono-ethyl phthalate; MBzP: mono-benzyl phthalate; MnBP: mono-n-butyl phthalate; MiBP: mono-iso-butyl phthalate; DEHP metabolites: sum of MEHP, 5OH-MEHP and 5oxo-MEHP.

Geometric means and percentiles are calculated on the basis of the 'raw' data, i.e. without weighing or correction for clustering, and without adjustment for confounders or covariates.

## 2. Identification of determinants of exposure

The results of the multiple regression models are given in Supplemental Material, Table S4 to Table S19.

**Table S4.** Determinants of exposure to mercury: multiple regression model in children.

| Parameters                             | Estimate (95%CI) for change (multiplicative factor) | p-value | Overall p-value |
|----------------------------------------|-----------------------------------------------------|---------|-----------------|
| <b>Gender</b>                          |                                                     |         |                 |
| Boys                                   | 0.96 (0.89, 1.05)                                   | 0.37    | 0.37            |
| Girls                                  | 1.00                                                |         |                 |
| <b>Age</b>                             |                                                     |         |                 |
| 5-8 years                              | 1.08 (1.00, 1.17)                                   | 0.06    | 0.06            |
| 9-11 years                             | 1.00                                                |         |                 |
| <b>Consumption of sea fish</b>         |                                                     |         |                 |
| Several times per week                 | 1.46 (1.26, 1.69)                                   | <0.001  | <0.001          |
| Once per week or less                  | 1.00                                                |         |                 |
| <b>Consumption of shellfish</b>        |                                                     |         |                 |
| Several times per week                 | 1.56 (1.35, 1.79)                                   | <0.001  | <0.001          |
| Once per week or less                  | 1.00                                                |         |                 |
| <b>Consumption of fresh water fish</b> |                                                     |         |                 |
| Several times per week                 | 1.23 (1.08, 1.39)                                   | <0.001  | <0.001          |
| Once per week or less                  | 1.00                                                |         |                 |
| <b>Educational level of the family</b> |                                                     |         |                 |
| Primary                                | 0.81 (0.69, 0.96)                                   | 0.01    | <0.001          |
| Secondary                              | 0.81 (0.74, 0.90)                                   | <0.001  |                 |
| Tertiary                               | 1.00                                                |         |                 |
| <b>Area of residence</b>               |                                                     |         |                 |
| Urban                                  | 1.35 (1.23, 1.47)                                   | <0.001  | <0.001          |
| Rural                                  | 1.00                                                |         |                 |

Number of observations in model: n=1798. Cluster variance: 0.70 (p=0.003); residual variance: 0.77; intra-class correlation coefficient: 0.47.

**Table S5.** Determinants of exposure to mercury: multiple regression model in mothers.

| Parameters                              | Estimate (95%CI) for change<br>(multiplicative factor) | p-value | Overall<br>p-value |
|-----------------------------------------|--------------------------------------------------------|---------|--------------------|
| <b>Age</b>                              |                                                        |         |                    |
| ≤ 35 years                              | 0.85 (0.76, 0.95)                                      | 0.004   | 0.007              |
| 35-40 years                             | 0.98 (0.89, 1.08)                                      | 0.69    |                    |
| > 40 years                              | 1.00                                                   |         |                    |
| <b>Consumption of sea fish</b>          |                                                        |         |                    |
| Several times per week                  | 1.51 (1.34, 1.71)                                      | <0.001  | <0.001             |
| Once per week or less                   | 1.00                                                   |         |                    |
| <b>Consumption of sea food products</b> |                                                        |         |                    |
| Several times per month                 | 1.16 (1.00, 1.35)                                      | 0.047   | 0.047              |
| Once per month or less                  | 1.00                                                   |         |                    |
| <b>Consumption of shellfish</b>         |                                                        |         |                    |
| Several times per week                  | 1.38 (1.24, 1.55)                                      | <0.001  | <0.001             |
| Once per week or less                   | 1.00                                                   |         |                    |
| <b>Consumption of fresh water fish</b>  |                                                        |         |                    |
| Several times per week                  | 1.23 (1.11, 1.37)                                      | <0.001  | <0.001             |
| Once per week or less                   | 1.00                                                   |         |                    |
| <b>Educational level of the family</b>  |                                                        |         |                    |
| Primary                                 | 0.75 (0.64, 0.87)                                      | <0.001  | <0.001             |
| Secondary                               | 0.79 (0.72, 0.87)                                      | <0.001  |                    |
| Tertiary                                | 1.00                                                   |         |                    |
| <b>Area of residence</b>                |                                                        |         |                    |
| Urban                                   | 1.30 (1.19, 1.41)                                      | <0.001  | <0.001             |
| Rural                                   | 1.00                                                   |         |                    |

Number of observations in model: n=1800. Cluster variance: 0.63 (p=0.003); residual variance: 0.69; intra-class correlation coefficient: 0.48.

**Table S6.** Determinants of urinary cotinine ( $\mu\text{g/L}$ ): multiple regression model in children.

| Parameters                             | Estimate (95%CI) for change<br>(multiplicative factor) | p-value | Overall<br>p-value |
|----------------------------------------|--------------------------------------------------------|---------|--------------------|
| <b>Urinary creatinine level</b>        |                                                        |         |                    |
| 300-900 mg/L                           | 0.89 (0.80 – 0.99)                                     | 0.03    | 0.10               |
| 900-1500 mg/L                          | 0.92 (0.83, 1.01)                                      | 0.09    |                    |
| 1500-3000 mg/L                         | 1.00                                                   |         |                    |
| <b>Gender</b>                          |                                                        |         |                    |
| Boys                                   | 1.03 (0.96, 1.11)                                      | 0.42    | 0.42               |
| Girls                                  | 1.00                                                   |         |                    |
| <b>Age</b>                             |                                                        |         |                    |
| 5-8 years                              | 1.16 (1.08, 1.25)                                      | <0.001  | <0.001             |
| 9-11 years                             | 1.00                                                   |         |                    |
| <b>ETS at home</b>                     |                                                        |         |                    |
| Daily                                  | 5.04 (4.29, 5.93)                                      | <0.001  | <0.001             |
| Less than daily                        | 1.81 (1.55, 2.11)                                      | <0.001  |                    |
| Never                                  | 1.00                                                   |         |                    |
| <b>ETS elsewhere</b>                   |                                                        |         |                    |
| Yes                                    | 1.19 (1.10, 1.29)                                      | <0.001  | <0.001             |
| No                                     | 1.00                                                   |         |                    |
| <b>ETS in last 24 hours</b>            |                                                        |         |                    |
| Yes                                    | 2.64 (2.30, 3.04)                                      | <0.001  | <0.001             |
| No                                     | 1.00                                                   |         |                    |
| <b>Educational level of the family</b> |                                                        |         |                    |
| Primary                                | 1.49 (1.29, 1.72)                                      | <0.001  | <0.001             |
| Secondary                              | 1.20 (1.10, 1.30)                                      | <0.001  |                    |
| Tertiary                               | 1.00                                                   |         |                    |

Number of observations in model: n=1809. Cluster variance: 0.25 (p=0.003); residual variance: 0.63; intra-class correlation coefficient: 0.28.

**Table S7.** Determinants of urinary cotinine ( $\mu\text{g/L}$ ): multiple regression model in mothers.

| Parameters                             | Estimate (95%CI) for change<br>(multiplicative factor) | p-value  | Overall<br>p-value |
|----------------------------------------|--------------------------------------------------------|----------|--------------------|
| <b>Urinary creatinine level</b>        |                                                        |          |                    |
| 300-900 mg/L                           | 0.90 (0.73, 1.11)                                      | 0.31     | 0.51               |
| 900-1500 mg/L                          | 0.99 (0.82, 1.21)                                      | 0.97     |                    |
| 1500-3000 mg/L                         | 1.00                                                   |          |                    |
| <b>Age</b>                             |                                                        |          |                    |
| $\leq 35$ years                        | 1.17 (0.93, 1.46)                                      | 0.17     | 0.22               |
| 35-40 years                            | 1.17 (0.97, 1.42)                                      | 0.10     |                    |
| $> 40$ years                           | 1.00                                                   |          |                    |
| <b>Smoking + ETS in last 24 hours</b>  |                                                        |          |                    |
| Smoker                                 | 4.31 (3.50, 5.31)                                      | $<0.001$ | $<0.001$           |
| Non-smoker, ETS in last 24 hrs         | 4.29 (3.21, 5.75)                                      |          |                    |
| Non-smoker, no ETS in last 24 hrs      | 1.00                                                   |          |                    |
| <b>Educational level of the family</b> |                                                        |          |                    |
| Primary                                | 1.82 (1.34, 2.47)                                      | $<0.001$ | $<0.001$           |
| Secondary                              | 1.52 (1.27, 1.83)                                      | $<0.001$ |                    |
| Tertiary                               | 1.00                                                   |          |                    |

Number of observations in model:  $n=1794$ . Cluster variance: 0.18 ( $p=0.01$ ); residual variance: 2.95; intraclass coefficient: 0.06.

**Table S8.** Determinants of urinary cadmium ( $\mu\text{g/L}$ ): multiple regression model in children.

| <b>Parameters</b>               | <b>Estimate (95%CI) for change<br/>(multiplicative factor)</b> | <b>p-value</b> | <b>Overall<br/>p-value</b> |
|---------------------------------|----------------------------------------------------------------|----------------|----------------------------|
| <b>Urinary creatinine level</b> |                                                                |                |                            |
| 300-900 mg/L                    | 0.50 (0.46, 0.55)                                              | <0.001         | <0.001                     |
| 900-1500 mg/L                   | 0.68 (0.62, 0.74)                                              | <0.001         |                            |
| 1500-3000 mg/L                  | 1.00                                                           |                |                            |
| <b>Gender</b>                   |                                                                |                |                            |
| Boys                            | 0.98 (0.92, 1.04)                                              | 0.49           | 0.49                       |
| Girls                           | 1.00                                                           |                |                            |
| <b>Age</b>                      |                                                                |                |                            |
| 5-8 years                       | 0.93 (0.87, 0.99)                                              | 0.03           | 0.03                       |
| 9-11 years                      | 1.00                                                           |                |                            |

Number of observations in model: n=1697. Cluster variance: 0.38 (p=0.003); residual variance: 0.4664; intra-class correlation coefficient: 0.45.

**Table S9.** Determinants of urinary cadmium ( $\mu\text{g/L}$ ): multiple regression model in mothers.

| Parameters                             | Estimate (95%CI) for change<br>(multiplicative factor) | p-value | Overall<br>p-value |
|----------------------------------------|--------------------------------------------------------|---------|--------------------|
| <b>Urinary creatinine level</b>        |                                                        |         |                    |
| 300-900 mg/L                           | 0.35 (0.32, 0.38)                                      | <0.001  | <0.001             |
| 900-1500 mg/L                          | 0.63 (0.58, 0.68)                                      | <0.001  |                    |
| 1500-3000 mg/L                         | 1.00                                                   |         |                    |
| <b>Age</b>                             |                                                        |         |                    |
| ≤ 35 years                             | 0.75 (0.68, 0.82)                                      | <0.001  | <0.001             |
| 35-40 years                            | 0.86 (0.79, 0.92)                                      | <0.001  |                    |
| > 40 years                             | 1.00                                                   |         |                    |
| <b>Smoking + ETS at home</b>           |                                                        |         |                    |
| Smoker                                 | 1.31 (1.21, 1.43)                                      | <0.001  | <0.001             |
| Non-smoker, ETS at home                | 1.10 (0.98, 1.24)                                      | 0.11    |                    |
| Non-smoker, no ETS at home             | 1.00                                                   |         |                    |
| <b>Water consumption</b>               |                                                        |         |                    |
| Public water                           | 1.28 (1.09, 1.51)                                      | 0.002   | 0.001              |
| Commercial products                    | 1.14 (0.95, 1.37)                                      | 0.17    |                    |
| Well/private water                     | 1.00                                                   |         |                    |
| <b>Educational level of the family</b> |                                                        |         |                    |
| Primary                                | 1.34 (1.17, 1.54)                                      | <0.001  | <0.001             |
| Secondary                              | 1.12 (1.04, 1.21)                                      | 0.003   |                    |
| Tertiary                               | 1.00                                                   |         |                    |

Number of observations in model: n=1678. Cluster variance: 0.07 (p=0.005); residual variance: 0.4589; intra-class correlation coefficient: 0.14.



**Table S10.** Determinants of urinary DEHP metabolites ( $\mu\text{g/L}$ ): multiple regression model in children.

| Parameters                      | Estimate (95%CI) for change<br>(multiplicative factor) | p-value | Overall<br>p-value |
|---------------------------------|--------------------------------------------------------|---------|--------------------|
| <b>Urinary creatinine level</b> |                                                        |         |                    |
| 300-900 mg/L                    | 0.46 (0.42,00.51)                                      | <0.001  | <0.001             |
| 900,01500 mg/L                  | 0.75 (0.69, 0.83)                                      | <0.001  |                    |
| 1500, 3000 mg/L                 | 1.00                                                   |         |                    |
| <b>Gender</b>                   |                                                        |         |                    |
| Boys                            | 1.02 (0.95, 1.09)                                      | 0.63    | 0.63               |
| Girls                           | 1.00                                                   |         |                    |
| <b>Age</b>                      |                                                        |         |                    |
| 5-8 years                       | 1.19 (1.11, 1.27)                                      | <0.001  | <0.001             |
| 9-11 years                      | 1.00                                                   |         |                    |
| <b>Ice cream consumption</b>    |                                                        |         |                    |
| Several times/week              | 1.12 (1.01, 1.25)                                      | 0.04    | 0.04               |
| Once/week or less               | 1.00                                                   |         |                    |
| <b>Gum consumption</b>          |                                                        |         |                    |
| Several times/week              | 1.10 (1.02, 1.18)                                      | 0.01    | 0.01               |
| Once/week or less               | 1.00                                                   |         |                    |

Urinary DEHP metabolites: sum of MEHP, 5OH-MEHP and 5oxo-MEHP.

Number of observations in model: N=1621. Cluster variance: 0.15 (p=0.004); residual variance: 0.4577; intra-class correlation coefficient: 0.24.

**Table S11.** Determinants of urinary DEHP metabolites ( $\mu\text{g/L}$ ): multiple regression model in mothers.

| Parameters                             | Estimate (95%CI) for change (multiplicative factor) | p-value | Overall p-value |
|----------------------------------------|-----------------------------------------------------|---------|-----------------|
| <b>Urinary creatinine level</b>        |                                                     |         |                 |
| 300-900 mg/L                           | 0.35 (0.32, 0.38)                                   | <0.001  | <0.001          |
| 900-1500 mg/L                          | 0.62 (0.57, 0.68)                                   | <0.001  |                 |
| 1500-3000 mg/L                         | 1.00                                                |         |                 |
| <b>Age</b>                             |                                                     |         |                 |
| ≤35 years                              | 0.96 (0.87, 1.06)                                   | 0.38    | 0.22            |
| 35-40 years                            | 0.99 (0.91, 1.07)                                   | 0.79    |                 |
| >40 years                              | 1.00                                                |         |                 |
| <b>Urine sampling period</b>           |                                                     |         |                 |
| <7 hours                               | 0.87 (0.79, 0.97)                                   | 0.01    | 0.02            |
| 7-9 hours                              | 0.97 (0.88, 1.06)                                   | 0.48    |                 |
| ≥ 9 hours                              | 1.00                                                |         |                 |
| <b>Use of personal care products</b>   |                                                     |         |                 |
| High use                               | 0.91(0.84, 0.98)                                    | 0.01    | 0.01            |
| Moderate to low use                    | 1.00                                                |         |                 |
| <b>Educational level of the family</b> |                                                     |         |                 |
| Primary                                | 1.20 (1.05, 1.37)                                   | 0.006   | 0.02            |
| Secondary                              | 1.04 (0.96, 1.13)                                   | 0.31    |                 |
| Tertiary                               | 1.00                                                |         |                 |

Urinary DEHP metabolites: sum of MEHP, 5OH-MEHP and 5oxo-MEHP.

Number of observations in model: N=1723. Cluster variance: 0.12 (p=0.004); residual variance: 0.5263; intra-class correlation coefficient: 0.18.

**Table S12.** Determinants of urinary MnBP ( $\mu\text{g/L}$ ): multiple regression model in children.

| Parameters                             | Estimate (95%CI) for change<br>(multiplicative factor) | p-value | Overall<br>p-value |
|----------------------------------------|--------------------------------------------------------|---------|--------------------|
| <b>Urinary creatinine level</b>        |                                                        |         |                    |
| 300-900 mg/L                           | 0.45 (0.41, 0.50)                                      | <0.001  | <0.001             |
| 900-1500 mg/L                          | 0.73 (0.66, 0.81)                                      | <0.001  |                    |
| 1500-3000 mg/L                         | 1.00                                                   |         |                    |
| <b>Gender</b>                          |                                                        |         |                    |
| Boys                                   | 0.91 (0.85, 0.98)                                      | 0.008   | 0.008              |
| Girls                                  | 1.00                                                   |         |                    |
| <b>Age</b>                             |                                                        |         |                    |
| 5-8 years                              | 1.15 (1.07, 1.24)                                      | <0.001  | <0.001             |
| 9-11 years                             | 1.00                                                   |         |                    |
| <b>PVC in floors/walls</b>             |                                                        |         |                    |
| Yes                                    | 1.19 (1.08, 1.32)                                      | <0.001  | <0.001             |
| No                                     | 1.00                                                   |         |                    |
| <b>Educational level of the family</b> |                                                        |         |                    |
| Primary                                | 0.91 (0.81, 1.03)                                      | 0.16    | 0.02               |
| Secondary                              | 0.89 (0.82, 0.97)                                      | 0.006   |                    |
| Tertiary                               | 1.00                                                   |         |                    |

Number of observations in model: N=1330. Cluster variance: 0.16 ( $p=0.009$ ); residual variance: 0.4396; intra-class correlation coefficient: 0.27.

**Table S13.** Determinants of urinary MnBP ( $\mu\text{g/L}$ ): multiple regression model in mothers.

| Parameters                           | Estimate (95%CI) for change<br>(multiplicative factor) | p-value | Overall<br>p-value |
|--------------------------------------|--------------------------------------------------------|---------|--------------------|
| <b>Urinary creatinine level</b>      |                                                        |         |                    |
| 300-900 mg/L                         | 0.35 (0.32, 0.38)                                      | <0.001  | <0.001             |
| 900-1500 mg/L                        | 0.60 (0.55, 0.66)                                      | <0.001  |                    |
| 1500-3000 mg/L                       | 1.00                                                   |         |                    |
| <b>Age</b>                           |                                                        |         |                    |
| ≤35 years                            | 0.81 (0.73, 0.89)                                      | <0.001  | <0.001             |
| 35-40 years                          | 0.93 (0.86, 1.01)                                      | 0.10    |                    |
| >40 years                            | 1.00                                                   |         |                    |
| <b>BMI</b>                           |                                                        |         |                    |
| Normal weight                        | 1.15 (1.02, 1.29)                                      | 0.02    | 0.047              |
| Overweight                           | 1.09 (0.96, 1.24)                                      | 0.17    |                    |
| Obese                                | 1.00                                                   |         |                    |
| <b>Ice cream consumption</b>         |                                                        |         |                    |
| Several times/month                  | 1.10 (1.01, 1.19)                                      | 0.02    | 0.02 *             |
| Once/month or less                   | 1.00                                                   |         |                    |
| <b>Use of personal care products</b> |                                                        |         |                    |
| High                                 | 0.92 (0.86, 0.99)                                      | 0.03    | 0.03               |
| Moderate/low                         | 1.00                                                   |         |                    |

Number of observations in model: N=1304. Cluster variance: 0.12 ( $p=0.01$ ); residual variance: 0.415; intra-class correlation coefficient: 0.22.

- not significant ( $p=0.22$ ) after weighing for unequal numbers per country.

**Table S14.** Determinants of urinary MBzP ( $\mu\text{g/L}$ ): multiple regression model in children.

| Parameters                      | Estimate (95%CI) for change<br>(multiplicative factor) | p-value | Overall<br>p-value |
|---------------------------------|--------------------------------------------------------|---------|--------------------|
| <b>Urinary creatinine level</b> |                                                        |         |                    |
| 300-900 mg/L                    | 0.41 (0.37, 0.47)                                      | <0.001  | <0.001             |
| 900-1500 mg/L                   | 0.69 (0.62, 0.78)                                      | <0.001  |                    |
| 1500-3000 mg/L                  | 1.00                                                   |         |                    |
| <b>Gender</b>                   |                                                        |         |                    |
| boys                            | 1.05 (0.96, 1.14)                                      | 0.30    | 0.30               |
| girls                           | 1.00                                                   |         |                    |
| <b>Age</b>                      |                                                        |         |                    |
| 5-8 years                       | 1.15 (1.06, 1.26)                                      | 0.001   | 0.001              |
| 9-11 years                      | 1.00                                                   |         |                    |
| <b>Morning urine</b>            |                                                        |         |                    |
| Yes                             | 1.98 (1.17, 3.36)                                      | 0.01    | 0.01               |
| No                              | 1.00                                                   |         |                    |
| <b>Ice cream consumption</b>    |                                                        |         |                    |
| Several times/week              | 1.18 (1.02, 1.36)                                      | 0.03    | 0.03               |
| Once/week or less               | 1.00                                                   |         |                    |
| <b>PVC in floors/walls</b>      |                                                        |         |                    |
| Yes                             | 1.50 (1.34, 1.68)                                      | <0.001  | <0.001             |
| No                              | 1.00                                                   |         |                    |

Number of observations in model: N=1722. Cluster variance: 0.17 ( $p=0.004$ ); residual variance: 0.818; intra-class correlation coefficient: 0.17.

**Table S15.** Determinants of urinary MBzP metabolites ( $\mu\text{g/L}$ ): multiple regression model in mothers.

| <b>Parameters</b>               | <b>Estimate (95%CI) for change<br/>(multiplicative factor)</b> | <b>p-value</b> | <b>Overall<br/>p-value</b> |
|---------------------------------|----------------------------------------------------------------|----------------|----------------------------|
| <b>Urinary creatinine level</b> |                                                                |                |                            |
| 300-900 mg/L                    | 0.33 (0.30, 0.37)                                              | <0.001         | <0.001                     |
| 900-1500 mg/L                   | 0.59 (0.54, 0.65)                                              | <0.001         |                            |
| 1500-3000 mg/L                  | 1.00                                                           |                |                            |
| <b>Age</b>                      |                                                                |                |                            |
| $\leq 35$ years                 | 1.01 (0.91, 1.13)                                              | 0.82           | 0.20                       |
| 35-40 years                     | 1.08 (0.99, 1.19)                                              | 0.10           |                            |
| >40 years                       | 1.00                                                           |                |                            |
| <b>Ice cream consumption</b>    |                                                                |                |                            |
| Several times/month             | 1.13 (1.03, 1.24)                                              | 0.01           | 0.01                       |
| Once/month or less              | 1.00                                                           |                |                            |
| <b>PVC in floors/walls</b>      |                                                                |                |                            |
| Yes                             | 1.32 (1.19, 1.47)                                              | <0.001         | <0.001                     |
| No                              | 1.00                                                           |                |                            |

Number of observations in model: N=1718. Cluster variance: 0.19 ( $p=0.004$ ); residual variance: 0.7003; intra-class correlation coefficient: 0.21.

**Table S16.** Determinants of urinary MEP ( $\mu\text{g/L}$ ): multiple regression model in children.

| Parameters                             | Estimate (95%CI) for change<br>(multiplicative factor) | p-value | Overall<br>p-value |
|----------------------------------------|--------------------------------------------------------|---------|--------------------|
| <b>Urinary creatinine level</b>        |                                                        |         |                    |
| 300-900 mg/L                           | 0.41 (0.36, 0.47)                                      | <0.001  | <0.001             |
| 900-1500 mg/L                          | 0.68 (0.61, 0.77)                                      | <0.001  |                    |
| 1500-3000 mg/L                         | 1.00                                                   |         |                    |
| <b>Gender</b>                          |                                                        |         |                    |
| Boys                                   | 0.96 (0.87, 1.05)                                      | 0.36    | 0.36               |
| Girls                                  | 1.00                                                   |         |                    |
| <b>Age</b>                             |                                                        |         |                    |
| 5-8 years                              | 1.15 (1.04, 1.26)                                      | 0.004   | 0.004              |
| 9-11 years                             | 1.00                                                   |         |                    |
| <b>Urine sampling period</b>           |                                                        |         |                    |
| <10 hours                              | 1.20 (1.06, 1.35)                                      | 0.003   | 0.01               |
| 10-11 hours                            | 1.14 (1.02, 1.29)                                      | 0.02    |                    |
| $\geq 11$ hours                        | 1.00                                                   |         |                    |
| <b>Use of personal care products</b>   |                                                        |         |                    |
| Moderate to high use                   | 1.24 (1.13, 1.37)                                      | <0.001  | <0.001             |
| Low use                                | 1.00                                                   |         |                    |
| <b>Educational level of the family</b> |                                                        |         |                    |
| Primary                                | 0.91 (0.81, 1.03)                                      | 0.16    | 0.02               |
| Secondary                              | 0.89 (0.82, 0.97)                                      | 0.006   |                    |
| Tertiary                               | 1.00                                                   |         |                    |

Number of observations in model: N=1601. Cluster variance: 0.16 ( $p=0.006$ ); residual variance: 1.2581; intra-class correlation coefficient: 0.11.

**Table S17.** Determinants of urinary MEP ( $\mu\text{g/L}$ ): multiple regression model in mothers.

| Parameters                           | Estimate (95%CI) for change<br>(multiplicative factor) | p-value | Overall<br>p-value |
|--------------------------------------|--------------------------------------------------------|---------|--------------------|
| <b>Urinary creatinine level</b>      |                                                        |         |                    |
| 300-900 mg/L                         | 0.32 (0.28, 0.37)                                      | <0.001  | <0.001             |
| 900-1500 mg/L                        | 0.63 (0.55, 0.72)                                      | <0.001  |                    |
| 1500-3000 mg/L                       | 1.00                                                   |         |                    |
| <b>Age</b>                           |                                                        |         |                    |
| ≤35 years                            | 0.87 (0.75, 1.02)                                      | 0.09    | 0.08               |
| 35-40 years                          | 0.87 (0.76, 0.99)                                      | 0.04    |                    |
| >40 years                            | 1.00                                                   |         |                    |
| <b>Gum consumption</b>               |                                                        |         |                    |
| Several times/week                   | 1.19 (1.06, 1.34)                                      | 0.003   | 0.003              |
| Once/week or less                    | 1.00                                                   |         |                    |
| <b>Use of personal care products</b> |                                                        |         |                    |
| High use                             | 1.40 (1.25, 1.56)                                      | <0.001  | <0.001             |
| Moderate to low use                  | 1.00                                                   |         |                    |

Number of observations in model: N=1601. Cluster variance: 0.16 (p=0.006); residual variance: 1.2581; intra-class correlation coefficient: 0.11.



**Table S18.** Determinants of urinary MiBP ( $\mu\text{g/L}$ ): multiple regression model in children.

| Parameters                           | Estimate (95%CI) for change (multiplicative factor) | p-value | Overall p-value |
|--------------------------------------|-----------------------------------------------------|---------|-----------------|
| <b>Urinary creatinine level</b>      |                                                     |         |                 |
| 300-900 mg/L                         | 0.45 (0.40, 0.50)                                   | <0.001  | <0.001          |
| 900-1500 mg/L                        | 0.72 (0.65, 0.80)                                   | <0.001  |                 |
| 1500-3000 mg/L                       | 1.00                                                |         |                 |
| <b>Gender</b>                        |                                                     |         |                 |
| boys                                 | 0.92 (0.85, 0.99)                                   | 0.03    | 0.03            |
| girls                                | 1.00                                                |         |                 |
| <b>Age</b>                           |                                                     |         |                 |
| 5-8 years                            | 1.19 (1.10, 1.28)                                   | <0.001  | <0.001          |
| 9-11 years                           | 1.00                                                |         |                 |
| <b>Use of personal care products</b> |                                                     |         |                 |
| Moderate to high use                 | 1.13 (1.03, 1.23)                                   | 0.007   | 0.007           |
| Low use                              | 1.00                                                |         |                 |
| <b>PVC in floors/walls</b>           |                                                     |         |                 |
| Yes                                  | 1.22 (1.09, 1.35)                                   | <0.001  | <0.001          |
| No                                   | 1.00                                                |         |                 |

Number of observations in model: N=1314. Cluster variance: 0.16 (p=0.009); residual variance: 0.4985; intra-class correlation coefficient: 0.24.

**Table S19.** Determinants of urinary MiBP ( $\mu\text{g/L}$ ): multiple regression model in mothers.

| Parameters                             | Estimate (95%CI) for change<br>(multiplicative factor) | p-value | Overall<br>p-value |
|----------------------------------------|--------------------------------------------------------|---------|--------------------|
| <b>Urinary creatinine level</b>        |                                                        |         |                    |
| 300-900 mg/L                           | 0.38 (0.35, 0.41)                                      | <0.001  | <0.001             |
| 900-1500 mg/L                          | 0.61 (0.56, 0.67)                                      | <0.001  |                    |
| 1500-3000 mg/L                         | 1.00                                                   |         |                    |
| <b>Age</b>                             |                                                        |         |                    |
| ≤35 years                              | 0.98 (0.88, 1.08)                                      | 0.65    | 0.70               |
| 35-40 years                            | 1.02 (0.94, 1.10)                                      | 0.69    |                    |
| >40 years                              | 1.00                                                   |         |                    |
| <b>Renovation in house</b>             |                                                        |         |                    |
| Yes                                    | 1.08 (1.00, 1.16)                                      | 0.04    | 0.04*              |
| No                                     | 1.00                                                   |         |                    |
| <b>PVC in floors/walls</b>             |                                                        |         |                    |
| Yes                                    | 1.15 (1.04, 1.26)                                      | 0.006   | 0.006              |
| No                                     | 1.00                                                   |         |                    |
| <b>Educational level of the family</b> |                                                        |         |                    |
| Primary                                | 1.09 (0.97, 1.23)                                      | 0.16    | 0.04               |
| Secondary                              | 1.11 (1.02, 1.21)                                      | 0.01    |                    |
| Tertiary                               | 1.00                                                   |         |                    |

Number of observations in model: N=1325. Cluster variance: 0.14 ( $p=0.010$ ); residual variance: 0.4162; intra-class correlation coefficient: 0.25.

\*Not significant ( $p=0.11$ ) after weighing for unequal numbers per country.

### 3. Comparison of results between countries

The results of the comparison between countries are given in Supplemental Material, Table S20 to Table S35.

**Table S20.** Comparison of mean mercury levels in hair ( $\mu\text{g/g}$ ) between 17 European countries, results in children, unadjusted and adjusted data.

| Country         | N    | LOQ          | % <LOQ | GM (95% CI),<br>unadjusted | <i>p</i> -value <sup>a</sup> | GM (95% CI),<br>adj. for age and gender | <i>p</i> -value <sup>a</sup> |
|-----------------|------|--------------|--------|----------------------------|------------------------------|-----------------------------------------|------------------------------|
| ALL             | 1836 | <0.001-0.137 | 14.1%  | 0.145 (0.139, 0.151)       | <0.001                       | 0.144 (0.139, 0.151)                    | <0.001                       |
| Belgium         | 127  | 0.08         | 19.7%  | 0.204 (0.713, 0.242)       | <0.001                       | 0.204 (0.173, 0.241)                    | <0.001                       |
| Switzerland     | 120  | 0.02         | 21.7%  | 0.077 (0.065, 0.091)       | <0.001                       | 0.076 (0.065, 0.090)                    | <0.001                       |
| Cyprus          | 60   | 0.01         | 1.7%   | 0.326 (0.257, 0.413)       | <0.001                       | 0.326 (0.257, 0.413)                    | <0.001                       |
| Czech Republic  | 120  | 0.014        | 0.0%   | 0.098 (0.083, 0.116)       | <0.001                       | 0.098 (0.083, 0.116)                    | <0.001                       |
| Germany         | 120  | 0.003        | 0.0%   | 0.055 (0.047, 0.065)       | <0.001                       | 0.055 (0.046, 0.065)                    | <0.001                       |
| Denmark         | 144  | 0.04         | 2.1%   | 0.249 (0.211, 0.295)       | <0.001                       | 0.250 (0.211, 0.295)                    | <0.001                       |
| Spain           | 120  | 0.01         | 0.0%   | 0.884 (0.747, 1.046)       | <0.001                       | 0.884 (0.747, 1.046)                    | <0.001                       |
| Hungary         | 119  | 0.015        | 48.7%  | 0.025 (0.021, 0.029)       | <0.001                       | 0.025 (0.021, 0.029)                    | <0.001                       |
| Ireland         | 120  | 0.07         | 37.0%  | 0.097 (0.082, 0.114)       | <0.001                       | 0.097 (0.082, 0.114)                    | <0.001                       |
| Luxembourg      | 56   | 0.005        | 0.0%   | 0.180 (0.142, 0.228)       | 0.06                         | 0.181 (0.142, 0.229)                    | 0.06                         |
| Poland          | 120  | 0.01         | 1.7%   | 0.070 (0.060, 0.083)       | <0.001                       | 0.070 (0.060, 0.083)                    | <0.001                       |
| Portugal        | 120  | 0.08         | 0.0%   | 1.035 (0.875, 1.225)       | <0.001                       | 1.033 (0.873, 1.222)                    | <0.001                       |
| Romania         | 120  | 0.137        | 8.7%   | 0.085 (0.072, 0.101)       | <0.001                       | 0.085 (0.072, 0.101)                    | <0.001                       |
| Sweden          | 100  | <0.001       | 0.0%   | 0.181 (0.153, 0.214)       | 0.007                        | 0.181 (0.153, 0.214)                    | 0.007                        |
| Slovenia        | 120  | 0.01         | 0.0%   | 0.168 (0.142, 0.199)       | 0.07                         | 0.169 (0.142, 0.200)                    | 0.06                         |
| Slovak Republic | 129  | 0.016        | 0.0%   | 0.092 (0.078, 0.109)       | <0.001                       | 0.092 (0.078, 0.109)                    | <0.001                       |
| United Kingdom  | 21   | 0.01         | 0.0%   | 0.193 (0.163, 0.228)       | <0.001                       | 0.192 (0.163, 0.228)                    | <0.001                       |

LOQ: limit of quantification; GM: geometric mean; CI: confidence interval.

<sup>a</sup>*p*-values for comparison between countries are calculated as follow: in a first step, overall significance of country is tested by a linear regression model (see *p*-value ALL in first row); in case of an overall significant difference between the countries ( $p < 0.05$ ), a *post hoc*

analysis is done and the mean exposure level in each country is compared with the European exposure value (see  $p$ -value per country in the following rows).

**Table S21.** Comparison of mean mercury levels ( $\mu\text{g/g}$ ) in hair between 17 European countries, results in mothers, unadjusted and adjusted data.

| Country         | N    | LOQ          | % <LOQ | GM (95% CI),<br>unadjusted | p-value | GM (95% CI),<br>adjusted for age | p-value |
|-----------------|------|--------------|--------|----------------------------|---------|----------------------------------|---------|
| ALL             | 1836 | <0.001-0.137 | 14.1%  | 0.225 (0.216, 0.234)       | <0.001  | 0.220 (0.212, 0.229)             | <0.001  |
| Belgium         | 127  | 0.08         | 19.7%  | 0.383 (0.327, 0.450)       | <0.001  | 0.368 (0.313, 0.431)             | <0.001  |
| Switzerland     | 120  | 0.02         | 21.7%  | 0.163 (0.139, 0.191)       | <0.001  | 0.153 (0.131, 0.180)             | <0.001  |
| Cyprus          | 60   | 0.01         | 1.7%   | 0.463 (0.369, 0.580)       | <0.001  | 0.462 (0.369, 0.578)             | <0.001  |
| Czech Republic  | 120  | 0.014        | 0.0%   | 0.155 (0.132, 0.182)       | <0.001  | 0.156 (0.133, 0.183)             | <0.001  |
| Germany         | 120  | 0.003        | 0.0%   | 0.113 (0.096, 0.133)       | <0.001  | 0.107 (0.092, 0.126)             | <0.001  |
| Denmark         | 144  | 0.04         | 2.1%   | 0.420 (0.358, 0.493)       | <0.001  | 0.391 (0.333, 0.458)             | <0.001  |
| Spain           | 120  | 0.01         | 0.0%   | 1.592 (1.357, 1.869)       | <0.001  | 1.468 (1.267, 1.744)             | <0.001  |
| Hungary         | 119  | 0.015        | 48.7%  | 0.038 (0.032, 0.044)       | <0.001  | 0.039 (0.033, 0.045)             | <0.001  |
| Ireland         | 120  | 0.07         | 37.5%  | 0.165 (0.141, 0.194)       | <0.001  | 0.162 (0.139, 0.190)             | <0.001  |
| Luxembourg      | 56   | 0.005        | 0.0%   | 0.416 (0.332, 0.522)       | <0.001  | 0.387 (0.308, 0.485)             | <0.001  |
| Poland          | 120  | 0.01         | 1.7%   | 0.131 (0.111, 0.153)       | <0.001  | 0.135 (0.116, 0.159)             | <0.001  |
| Portugal        | 120  | 0.08         | 0.0%   | 1.203 (1.025, 1.412)       | <0.001  | 1.200 (1.023, 1.406)             | <0.001  |
| Romania         | 120  | 0.137        | 81.7%  | 0.095 (0.081, 0.111)       | <0.001  | 0.100 (0.085, 0.117)             | <0.001  |
| Sweden          | 100  | <0.001       | 0.0%   | 0.260 (0.222, 0.305)       | 0.07    | 0.252 (0.215, 0.295)             | 0.09    |
| Slovenia        | 120  | 0.01         | 0.0%   | 0.263 (0.224, 0.309)       | 0.046   | 0.255 (0.217, 0.299)             | 0.06    |
| Slovak Republic | 129  | 0.016        | 0.0%   | 0.129 (0.110, 0.152)       | <0.001  | 0.132 (0.112, 0.154)             | <0.001  |
| United Kingdom  | 21   | 0.01         | 0.0%   | 0.163 (0.139, 0.192)       | <0.001  | 0.153 (0.130, 0.180)             | <0.001  |

LOQ: limit of quantification; GM: geometric mean; CI: confidence interval.

**Table S22.** Comparison of mean urinary cotinine levels between 17 European countries, results in children, unadjusted and adjusted data.

| Country         | N    | LOQ (µg/L) | % <LOQ | Urinary cotinine (µg/L) GM (95% CI) unadjusted | p-value | Urinary cotinine (µg/L) GM (95% CI), adjusted <sup>a</sup> | p-value | Urinary cotinine (µg/g creatinine) GM (95% CI), unadjusted | p-value | Urinary cotinine (µg/g creatinine) GM (95% CI), adjusted <sup>b</sup> | p-value |
|-----------------|------|------------|--------|------------------------------------------------|---------|------------------------------------------------------------|---------|------------------------------------------------------------|---------|-----------------------------------------------------------------------|---------|
| ALL             | 1818 | 0.1–1.2    | 57.6%  | 0.797 (0.759, 0.837)                           | <0.001  | 0.800 (0.760, 0.843)                                       | <0.001  | 0.774 (0.736, 0.815)                                       | <0.001  | 0.774 (0.735, 0.815)                                                  | <0.001  |
| Belgium         | 125  | 0.7        | 65.6%  | 0.634 (0.521, 0.771)                           | 0.02    | 0.629 (0.517, 0.766)                                       | 0.01    | 0.566 (0.461, 0.696)                                       | 0.002   | 0.566 (0.461, 0.695)                                                  | 0.002   |
| Switzerland     | 119  | 1          | 98.3%  | 0.506 (0.416, 0.615)                           | <0.001  | 0.508 (0.418, 0.619)                                       | <0.001  | 0.487 (0.396, 0.598)                                       | <0.001  | 0.484 (0.394, 0.594)                                                  | <0.001  |
| Cyprus          | 60   | 0.8        | 53.3%  | 0.841 (0.638, 1.110)                           | 0.70    | 0.842 (0.638, 1.111)                                       | 0.72    | 0.804 (0.601, 1.076)                                       | 0.80    | 0.804 (0.602, 1.075)                                                  | 0.79    |
| Czech Republic  | 120  | 0.3        | 0.0%   | 1.585 (1.303, 1.928)                           | <0.001  | 1.602 (1.361, 1.950)                                       | <0.001  | 1.615 (1.315, 1.984)                                       | <0.001  | 1.612 (1.313, 1.979)                                                  | <0.001  |
| Germany         | 120  | 0.1        | 13.3%  | 0.308 (0.253, 0.374)                           | <0.001  | 0.305 (0.251, 0.371)                                       | <0.001  | 0.280 (0.228, 0.344)                                       | <0.001  | 0.277 (0.225, 0.340)                                                  | <0.001  |
| Denmark         | 144  | 0.75       | 64.6%  | 0.649 (0.534, 0.790)                           | 0.03    | 0.658 (0.541, 0.801)                                       | 0.04    | 0.679 (0.553, 0.835)                                       | 0.20    | 0.682 (0.555, 0.837)                                                  | 0.21    |
| Spain           | 119  | 0.1        | 0.0%   | 1.459 (1.200, 1.775)                           | <0.001  | 1.485 (1.219, 1.810)                                       | <0.001  | 1.596 (1.299, 1.961)                                       | <0.001  | 1.595 (1.299, 1.958)                                                  | <0.001  |
| Hungary         | 117  | 0.3        | 0.0%   | 1.800 (1.480, 2.190)                           | <0.001  | 1.7736 (1.460, 2.161)                                      | <0.001  | 1.593 (1.297, 1.957)                                       | <0.001  | 1.592 (1.297, 1.954)                                                  | <0.001  |
| Ireland         | 120  | 0.48       | 61.7%  | 0.712 (0.585, 0.866)                           | 0.24    | 0.708 (0.582, 0.862)                                       | 0.21    | 0.659 (0.537, 0.810)                                       | 0.11    | 0.659 (0.537, 0.809)                                                  | 0.11    |
| Luxembourg      | 59   | 0.59       | 83.1%  | 0.391 (0.297, 0.516)                           | <0.001  | 0.397 (0.301, 0.524)                                       | <0.001  | 0.390 (0.292, 0.522)                                       | <0.001  | 0.391 (0.292, 0.522)                                                  | <0.001  |
| Poland          | 115  | 0.8        | 34.8%  | 1.558 (1.281, 1.895)                           | <0.001  | 1.568 (1.288, 1.909)                                       | <0.001  | 1.596 (1.299, 1.961)                                       | <0.001  | 1.598 (1.301, 1.961)                                                  | <0.001  |
| Portugal        | 116  | 0.7        | 39.7%  | 1.073 (0.882, 1.305)                           | 0.002   | 1.093 (0.897, 1.333)                                       | <0.001  | 1.194 (0.972, 1.466)                                       | <0.001  | 1.191 (0.970, 1.463)                                                  | <0.001  |
| Romania         | 119  | 0.7        | 26.1%  | 1.953 (1.605, 2.375)                           | <0.001  | 1.942 (1.597, 2.363)                                       | <0.001  | 1.723 (1.402, 2.116)                                       | <0.001  | 1.723 (1.404, 2.116)                                                  | <0.001  |
| Sweden          | 97   | 0.3        | 84.5%  | 0.199 (0.163, 0.242)                           | <0.001  | 0.202 (0.165, 0.246)                                       | <0.001  | 0.224 (0.183, 0.276)                                       | <0.001  | 0.224 (0.182, 0.275)                                                  | <0.001  |
| Slovenia        | 120  | 0.7        | 74.2%  | 0.532 (0.438, 0.648)                           | <0.001  | 0.529 (0.434, 0.644)                                       | <0.001  | 0.442 (0.360, 0.543)                                       | <0.001  | 0.446 (0.363, 0.549)                                                  | <0.001  |
| Slovak Republic | 127  | 0.3        | 0.0%   | 1.104 (0.907, 1.342)                           | <0.001  | 1.085 (0.892, 1.320)                                       | 0.002   | 0.911 (0.742, 1.119)                                       | 0.11    | 0.908 (0.740, 1.115)                                                  | 0.11    |
| United Kingdom  | 21   | 1.2        | 95.2%  | 0.641 (0.527, 0.780)                           | 0.02    | 0.661 (0.542, 0.806)                                       | 0.049   | 0.712 (0.580, 0.875)                                       | 0.41    | 0.712 (0.580, 0.874)                                                  | 0.41    |

LOQ: limit of quantification; GM: geometric mean; CI: confidence interval.

<sup>a</sup>Adjusted for age, gender and creatinine. <sup>b</sup>Adjusted for age and gender.

**Table S23.** Comparison of mean urinary cotinine levels between 17 European countries, results in mothers, unadjusted and adjusted data.

| Country         | N    | LOQ (µg/L) | % <LOQ | Urinary cotinine (µg/L) GM (95% CI), unadjusted | p-value | Urinary cotinine (µg/L) GM (95% CI), adjusted <sup>a</sup> | p-value | Urinary cotinine (µg/g creatinine) GM (95% CI), unadjusted | p-value | Urinary cotinine (µg/g creatinine) GM (95% CI), adjusted <sup>b</sup> | p-value |
|-----------------|------|------------|--------|-------------------------------------------------|---------|------------------------------------------------------------|---------|------------------------------------------------------------|---------|-----------------------------------------------------------------------|---------|
| ALL             | 1800 | 0.1-1.2    | 62.4%  | 2.75 (2.41, 3.14)                               | <0.001  | 2.85 (2.49, 3.27)                                          | <0.001  | 2.45 (2.14, 2.80)                                          | <0.001  | 2.53 (2.21, 2.90)                                                     | <0.001  |
| Belgium         | 125  | 0.7        | 69.6%  | 1.15 (0.67, 1.97)                               | <0.001  | 1.26 (0.74, 2.15)                                          | 0.002   | 1.02 (0.60, 1.76)                                          | <0.001  | 1.10 (0.64, 1.88)                                                     | 0.002   |
| Switzerland     | 117  | 1          | 94.0%  | 0.71 (0.42, 1.21)                               | <0.001  | 0.84 (0.49, 1.45)                                          | <0.001  | 0.73 (0.43, 1.26)                                          | <0.001  | 0.82 (0.48, 1.40)                                                     | <0.001  |
| Cyprus          | 59   | 0.8        | 40.7%  | 2.87 (1.35, 6.12)                               | 0.91    | 2.82 (1.33, 6.00)                                          | 0.98    | 2.47 (1.16, 5.27)                                          | 0.98    | 2.49 (1.17, 5.29)                                                     | 0.96    |
| Czech Republic  | 117  | 0.3        | 0.0%   | 3.80 (2.22, 6.50)                               | 0.22    | 3.77 (2.21, 6.44)                                          | 0.29    | 3.58 (2.09, 6.11)                                          | 0.15    | 3.51 (2.06, 6.00)                                                     | 0.22    |
| Germany         | 116  | 0.1        | 13.8%  | 0.92 (0.54, 1.57)                               | <0.001  | 1.00 (0.59, 1.72)                                          | <0.001  | 0.81 (0.48, 1.39)                                          | <0.001  | 0.88 (0.52, 1.51)                                                     | <0.001  |
| Denmark         | 143  | 0.75       | 51.7%  | 1.54 (0.90, 2.63)                               | 0.03    | 1.87 (1.09, 3.21)                                          | 0.11    | 1.57 (0.92, 2.68)                                          | 0.09    | 1.78 (1.04, 3.06)                                                     | 0.19    |
| Spain           | 118  | 0.1        | 1.7%   | 8.32 (4.87, 14.2)                               | <0.001  | 9.59 (5.60, 16.4)                                          | <0.001  | 7.79 (4.56, 13.3)                                          | <0.001  | 8.78 (5.12, 15.1)                                                     | <0.001  |
| Hungary         | 115  | 0.3        | 0.0%   | 7.97 (4.67, 13.6)                               | <0.001  | 7.19 (1.09, 3.21)                                          | <0.001  | 6.40 (3.74, 10.9)                                          | <0.001  | 6.05 (3.54, 10.3)                                                     | <0.001  |
| Ireland         | 120  | 0.48       | 52.5%  | 3.84 (2.24, 6.56)                               | 0.21    | 3.86 (2.27, 6.58)                                          | 0.25    | 3.28 (1.92, 5.60)                                          | 0.27    | 3.37 (1.98, 5.75)                                                     | 0.28    |
| Luxembourg      | 56   | 0.59       | 83.9%  | 0.47 (0.22, 1.00)                               | <0.001  | 0.56 (0.26, 1.19)                                          | <0.001  | 0.50 (0.24, 1.08)                                          | <0.001  | 0.56 (0.26, 1.20)                                                     | <0.001  |
| Poland          | 119  | 0.8        | 36.1%  | 6.67 (3.91, 11.4)                               | <0.001  | 6.22 (3.64, 10.6)                                          | 0.003   | 6.07 (3.56, 10.4)                                          | <0.001  | 5.71 (3.34, 9.75)                                                     | 0.002   |
| Portugal        | 117  | 0.7        | 35.0%  | 11.4 (6.67, 19.5)                               | <0.001  | 10.9 (6.40, 18.6)                                          | <0.001  | 9.15 (5.36, 15.6)                                          | <0.001  | 9.09 (5.33, 15.5)                                                     | <0.001  |
| Romania         | 117  | 0.7        | 18.8%  | 17.5 (10.3, 30.0)                               | <0.001  | 14.9 (8.70, 25.6)                                          | <0.001  | 13.6 (7.99, 23.3)                                          | <0.001  | 12.3 (7.2, 21.1)                                                      | <0.001  |
| Sweden          | 96   | 0.3        | 59.4%  | 1.67 (0.98, 2.85)                               | 0.06    | 1.80 (1.06, 3.08)                                          | 0.08    | 1.57 (0.92, 2.69)                                          | 0.09    | 1.64 (0.96, 2.81)                                                     | 0.10    |
| Slovenia        | 119  | 0.7        | 59.7%  | 1.75 (1.02, 2.98)                               | 0.09    | 1.79 (1.05, 3.06)                                          | 0.08    | 1.36 (0.79, 2.31)                                          | 0.03    | 1.44 (0.84, 2.46)                                                     | 0.03    |
| Slovak Republic | 125  | 0.3        | 0.0%   | 3.00 (1.75, 5.12)                               | 0.75    | 2.82 (1.65, 4.81)                                          | 0.96    | 2.43 (1.42, 4.16)                                          | 0.98    | 2.37 (1.38, 4.03)                                                     | 0.79    |
| United Kingdom  | 21   | 1.2        | 90.5%  | 0.71 (0.41, 1.21)                               | <0.001  | 0.84 (0.49, 1.45)                                          | <0.001  | 0.68 (0.40, 1.16)                                          | <0.001  | 0.77 (0.45, 1.33)                                                     | <0.001  |

LOQ: limit of quantification; GM: geometric mean; CI: confidence interval.

<sup>a</sup>Adjusted for age and creatinine. <sup>b</sup>Adjusted for age.

**Table S24.** Comparison of mean urinary cadmium levels between 17 European countries, results in children, unadjusted and adjusted data.

| Country         | N    | LOQ (µg/L) | % <LOQ | Urinary cadmium (µg/L) GM (95% CI), unadjusted | p-value | Urinary cadmium (µg/L) GM (95% CI), adjusted <sup>a</sup> | p-value | Urinary cadmium (µg/g creatinine) GM (95% CI), unadjusted | p-value | Urinary cadmium (µg/g creatinine) GM (95% CI), adjusted <sup>b</sup> | p-value |
|-----------------|------|------------|--------|------------------------------------------------|---------|-----------------------------------------------------------|---------|-----------------------------------------------------------|---------|----------------------------------------------------------------------|---------|
| ALL             | 1698 | <0.001-0.2 | 29.9%  | 0.071 (0.069, 0.074)                           | <0.001  | 0.076 (0.073, 0.078)                                      | <0.001  | 0.070 (0.067, 0.072)                                      | <0.001  | 0.070 (0.067, 0.072)                                                 | <0.001  |
| Belgium         | 125  | 0.01       | 13.6%  | 0.044 (0.039, 0.050)                           | <0.001  | 0.046 (0.041, 0.052)                                      | <0.001  | 0.039 (0.035, 0.045)                                      | <0.001  | 0.039 (0.035, 0.045)                                                 | <0.001  |
| Switzerland     | 119  | 0.07       | 31.9%  | 0.076 (0.067, 0.087)                           | 0.31    | 0.080 (0.071, 0.091)                                      | 0.32    | 0.073 (0.065, 0.083)                                      | 0.41    | 0.073 (0.064, 0.083)                                                 | 0.43    |
| Cyprus          | 60   | 0.2        | 91.7%  | 0.108 (0.090, 0.130)                           | <0.001  | 0.115 (0.097, 0.137)                                      | <0.001  | 0.103 (0.086, 0.123)                                      | <0.001  | 0.103 (0.086, 0.123)                                                 | <0.001  |
| Czech Republic  | 120  | 0.05       | 8.3%   | 0.109 (0.096, 0.124)                           | <0.001  | 0.118 (0.104, 0.133)                                      | <0.001  | 0.111 (0.098, 0.126)                                      | <0.001  | 0.111 (0.098, 0.126)                                                 | <0.001  |
| Denmark         | 142  | 0.025      | 66.9%  | 0.021 (0.019, 0.024)                           | <0.001  | 0.023 (0.021, 0.026)                                      | <0.001  | 0.022 (0.020, 0.025)                                      | <0.001  | 0.022 (0.020, 0.025)                                                 | <0.001  |
| Spain           | 119  | 0.025      | 26.9%  | 0.042 (0.037, 0.048)                           | <0.001  | 0.047 (0.042, 0.053)                                      | <0.001  | 0.046 (0.040, 0.052)                                      | <0.001  | 0.046 (0.040, 0.052)                                                 | <0.001  |
| Hungary         | 117  | 0.1        | 29.9%  | 0.132 (0.116, 0.150)                           | <0.001  | 0.130 (0.115, 0.147)                                      | <0.001  | 0.117 (0.103, 0.132)                                      | <0.001  | 0.117 (0.103, 0.132)                                                 | <0.001  |
| Ireland         | 120  | 0.064      | 44.2%  | 0.066 (0.058, 0.075)                           | 0.19    | 0.068 (0.060, 0.076)                                      | 0.06    | 0.061 (0.054, 0.069)                                      | 0.03    | 0.061 (0.054, 0.069)                                                 | 0.03    |
| Luxembourg      | 59   | 0.05       | 0.0%   | 0.144 (0.119, 0.173)                           | <0.001  | 0.154 (0.130, 0.184)                                      | <0.001  | 0.143 (0.120, 0.171)                                      | <0.001  | 0.143 (0.120, 0.171)                                                 | <0.001  |
| Poland          | 115  | 0.012      | 0.0%   | 0.126 (0.111, 0.144)                           | <0.001  | 0.135 (0.119, 0.153)                                      | <0.001  | 0.129 (0.114, 0.147)                                      | <0.001  | 0.129 (0.114, 0.147)                                                 | <0.001  |
| Portugal        | 116  | 0.01       | 12.1%  | 0.039 (0.034, 0.045)                           | <0.001  | 0.045 (0.040, 0.051)                                      | <0.001  | 0.044 (0.039, 0.050)                                      | <0.001  | 0.044 (0.039, 0.050)                                                 | <0.001  |
| Romania         | 119  | 0.051      | 95.0%  | 0.027 (0.024, 0.031)                           | <0.001  | 0.026 (0.023, 0.030)                                      | <0.001  | 0.024 (0.021, 0.027)                                      | <0.001  | 0.024 (0.021, 0.027)                                                 | <0.001  |
| Sweden          | 99   | <0.001     | 0.0%   | 0.078 (0.068, 0.089)                           | 0.17    | 0.090 (0.079, 0.102)                                      | 0.005   | 0.088 (0.077, 0.099)                                      | <0.001  | 0.088 (0.077, 0.099)                                                 | <0.001  |
| Slovenia        | 120  | 0.06       | 35.8%  | 0.081 (0.071, 0.092)                           | 0.05    | 0.077 (0.068, 0.087)                                      | 0.77    | 0.067 (0.059, 0.076)                                      | 0.57    | 0.067 (0.059, 0.076)                                                 | 0.53    |
| Slovak Republic | 127  | 0.05       | 2.4%   | 0.149 (0.131, 0.170)                           | <0.001  | 0.145 (0.128, 0.164)                                      | <0.001  | 0.123 (0.108, 0.139)                                      | <0.001  | 0.123 (0.109, 0.139)                                                 | <0.001  |
| United Kingdom  | 21   | 0.01       | 0.0%   | 0.144 (0.126, 0.164)                           | <0.001  | 0.166 (0.147, 0.188)                                      | <0.001  | 0.160 (0.141, 0.181)                                      | <0.001  | 0.159 (0.140, 0.180)                                                 | <0.001  |

LOQ: limit of quantification; GM: geometric mean; CI: confidence interval.

<sup>a</sup>Adjusted for age, gender and creatinine. <sup>b</sup>Adjusted for age and gender.



**Table S25.** Comparison of mean urinary cadmium levels between 17 European countries, results in mothers, unadjusted and adjusted data.

| Country         | N    | LOQ (µg/L) | % <LOQ | Urinary cadmium (µg/L) GM (95% CI), unadjusted | p-value | Urinary cadmium (µg/L) GM (95% CI), adjusted <sup>a</sup> | p-value | Urinary cadmium (µg/g creatinine) GM (95% CI), unadjusted | p-value | Urinary cadmium (µg/g creatinine) GM (95% CI), adjusted <sup>b</sup> | p-value |
|-----------------|------|------------|--------|------------------------------------------------|---------|-----------------------------------------------------------|---------|-----------------------------------------------------------|---------|----------------------------------------------------------------------|---------|
| ALL             | 1685 | <0.001-0.2 | 6.2%   | 0.219 (0.211, 0.228)                           | <0.001  | 0.230 (0.220, 0.241)                                      | <0.001  | 0.196 (0.189, 0.202)                                      | <0.001  | 0.204 (0.195, 0.213)                                                 | <0.001  |
| Belgium         | 125  | 0.01       | 0.8%   | 0.205 (0.177, 0.238)                           | 0.35    | 0.224 (0.197, 0.255)                                      | 0.66    | 0.183 (0.162, 0.207)                                      | 0.27    | 0.194 (0.171, 0.219)                                                 | 0.38    |
| Switzerland     | 117  | 0.07       | 6.0%   | 0.189 (0.163, 0.219)                           | 0.04    | 0.224 (0.197, 0.255)                                      | 0.66    | 0.196 (0.173, 0.221)                                      | 0.99    | 0.205 (0.181, 0.232)                                                 | 0.94    |
| Cyprus          | 59   | 0.2        | 52.5%  | 0.182 (0.148, 0.224)                           | 0.08    | 0.183 (0.153, 0.219)                                      | 0.009   | 0.157 (0.132, 0.187)                                      | 0.01    | 0.165 (0.139, 0.197)                                                 | 0.01    |
| Czech Republic  | 117  | 0.05       | 0.9%   | 0.227 (0.196, 0.263)                           | 0.65    | 0.259 (0.228, 0.295)                                      | 0.05    | 0.213 (0.189, 0.242)                                      | 0.15    | 0.235 (0.208, 0.266)                                                 | 0.02    |
| Denmark         | 142  | 0.025      | 8.5%   | 0.115 (0.099, 0.133)                           | <0.001  | 0.132 (0.116, 0.150)                                      | <0.001  | 0.118 (0.104, 0.134)                                      | <0.001  | 0.119 (0.105, 0.135)                                                 | <0.001  |
| Spain           | 118  | 0.025      | 1.7%   | 0.230 (0.198, 0.266)                           | 0.53    | 0.212 (0.187, 0.241)                                      | 0.18    | 0.215 (0.190, 0.243)                                      | 0.12    | 0.196 (0.173, 0.220)                                                 | 0.50    |
| Hungary         | 115  | 0.1        | 19.1%  | 0.188 (0.162, 0.217)                           | 0.03    | 0.183 (0.161, 0.207)                                      | <0.001  | 0.150 (0.133, 0.170)                                      | <0.001  | 0.159 (0.141, 0.180)                                                 | <0.001  |
| Ireland         | 120  | 0.064      | 4.2%   | 0.314 (0.271, 0.363)                           | <0.001  | 0.296 (0.261, 0.207)                                      | <0.001  | 0.268 (0.237, 0.303)                                      | <0.001  | 0.265 (0.235, 0.300)                                                 | <0.001  |
| Luxembourg      | 56   | 0.05       | 0.0%   | 0.200 (0.162, 0.246)                           | 0.37    | 0.249 (0.208, 0.298)                                      | 0.38    | 0.215 (0.180, 0.256)                                      | 0.29    | 0.231 (0.194, 0.275)                                                 | 0.15    |
| Poland          | 119  | 0.012      | 0.0%   | 0.416 (0.359, 0.482)                           | <0.001  | 0.453 (0.399, 0.514)                                      | <0.001  | 0.379 (0.334, 0.429)                                      | <0.001  | 0.408 (0.361, 0.461)                                                 | <0.001  |
| Portugal        | 117  | 0.01       | 0.9%   | 0.201 (0.174, 0.233)                           | 0.23    | 0.186 (0.164, 0.211)                                      | <0.001  | 0.161 (0.143, 0.183)                                      | 0.002   | 0.160 (0.142, 0.181)                                                 | <0.001  |
| Romania         | 117  | 0.051      | 16.2%  | 0.192 (0.165, 0.222)                           | 0.06    | 0.187 (0.164, 0.121)                                      | <0.001  | 0.149 (0.132, 0.169)                                      | <0.001  | 0.160 (0.142, 0.181)                                                 | <0.001  |
| Sweden          | 98   | <0.001     | 0.0%   | 0.147 (0.127, 0.170)                           | <0.001  | 0.175 (0.154, 0.199)                                      | <0.001  | 0.139 (0.123, 0.157)                                      | <0.001  | 0.152 (0.134, 0.173)                                                 | <0.001  |
| Slovenia        | 119  | 0.06       | 2.5%   | 0.298 (0.257, 0.345)                           | <0.001  | 0.289 (0.255, 0.329)                                      | <0.001  | 0.231 (0.204, 0.262)                                      | 0.006   | 0.244 (0.216, 0.276)                                                 | 0.002   |
| Slovak Republic | 125  | 0.05       | 0.0%   | 0.294 (0.254, 0.341)                           | <0.001  | 0.306 (0.269, 0.348)                                      | <0.001  | 0.239 (0.211, 0.271)                                      | <0.001  | 0.261 (0.231, 0.296)                                                 | <0.001  |
| United Kingdom  | 21   | 0.01       | 0.0%   | 0.244 (0.211, 0.283)                           | 0.14    | 0.267 (0.234, 0.304)                                      | 0.02    | 0.234 (0.207, 0.265)                                      | 0.003   | 0.241 (0.212, 0.274)                                                 | 0.006   |

LOQ: limit of quantification; GM: geometric mean; CI: confidence interval.

<sup>a</sup>Adjusted for age, smoking and creatinine. <sup>b</sup>Adjusted for age and smoking.

**Table S26.** Comparison of mean urinary level of DEHP metabolites between 17 European countries, results in children, unadjusted and adjusted data.

| Country         | N    | LOQ MEHP (µg/L) | LOQ 5OH-MEHP (µg/L) | LOQ 5oxo-MEHP (µg/L) | % <LOQ | Urinary DEHP (µg/L) GM (95% CI), unadjusted | p-value | Urinary DEHP (µg/L) GM (95% CI), adjusted <sup>a</sup> | p-value | Urinary DEHP (µg/g creatinine) GM (95% CI), unadjusted | p-value | Urinary DEHP (µg/g creatinine) GM (95% CI), adjusted <sup>b</sup> | p-value |
|-----------------|------|-----------------|---------------------|----------------------|--------|---------------------------------------------|---------|--------------------------------------------------------|---------|--------------------------------------------------------|---------|-------------------------------------------------------------------|---------|
| ALL             | 1816 | 0.3-3.9         | 0.1-9.2             | 0.1-6.2              | 14.4%  | 47.6 (46.0, 49.3)                           | <0.001  | 50.0 (48.4, 51.7)                                      | <0.001  | 46.2 (44.9, 47.7)                                      | <0.001  | 46.2 (44.8, 47.6)                                                 | <0.001  |
| Belgium         | 125  | 0.5             | 0.1                 | 0.1                  | 4.8%   | 36.7 (32.1, 42.1)                           | <0.001  | 37.3 (32.9, 42.2)                                      | <0.001  | 32.8 (29.0, 37.1)                                      | <0.001  | 32.8 (29.1, 37.0)                                                 | <0.001  |
| Switzerland     | 119  | 3.9             | 9.2                 | 6.2                  | 85.7%  | 26.9 (23.4, 30.8)                           | <0.001  | 28.1 (24.8, 31.9)                                      | <0.001  | 25.8 (22.9, 29.2)                                      | <0.001  | 25.1 (22.8, 29.0)                                                 | <0.001  |
| Cyprus          | 60   | 2.6             | 2.5                 | 1.6                  | 46.7%  | 23.8 (19.6, 28.8)                           | <0.001  | 25.0 (21.0, 29.8)                                      | <0.001  | 22.7 (19.1, 27.0)                                      | <0.001  | 22.7 (19.2, 26.9)                                                 | <0.001  |
| Czech Republic  | 120  | 2               | 0.61                | 0.24                 | 27.5%  | 65.7 (57.3, 75.2)                           | <0.001  | 71.1 (62.7, 80.5)                                      | <0.001  | 67.0 (59.3, 75.7)                                      | <0.001  | 66.8 (59.2, 75.4)                                                 | <0.001  |
| Germany         | 120  | 0.5             | 0.2                 | 0.2                  | 6.7%   | 39.2 (34.2, 44.9)                           | 0.004   | 39.5 (34.9, 44.8)                                      | <0.001  | 35.6 (31.5, 40.2)                                      | <0.001  | 35.1 (31.1, 39.6)                                                 | <0.001  |
| Denmark         | 142  | 0.14            | 0.91                | 0.67                 | 4.2%   | 37.3 (32.6, 42.8)                           | <0.001  | 40.9 (36.1, 46.4)                                      | <0.001  | 38.8 (34.3, 43.9)                                      | 0.004   | 39.1 (34.6, 44.1)                                                 | 0.005   |
| Spain           | 119  | 0.5             | 0.2                 | 0.2                  | 0.0%   | 64.6 (56.4, 74.0)                           | <0.001  | 73.4 (64.7, 83.2)                                      | <0.001  | 70.7 (62.6, 79.9)                                      | <0.001  | 70.6 (62.6, 79.7)                                                 | <0.001  |
| Hungary         | 117  | 2               | 0.61                | 0.24                 | 24.8%  | 60.8 (53.1, 69.7)                           | <0.001  | 58.7 (51.8, 66.5)                                      | 0.009   | 53.8 (47.6, 60.8)                                      | 0.012   | 53.7 (47.6, 60.6)                                                 | 0.011   |
| Ireland         | 120  | 1               | 0.5                 | 0.5                  | 0.0%   | 58.8 (51.4, 67.4)                           | 0.002   | 59.6 (52.6, 67.5)                                      | 0.004   | 54.5 (48.2, 61.6)                                      | 0.006   | 54.4 (48.2, 61.4)                                                 | 0.006   |
| Luxembourg      | 59   | 0.5             | 0.1                 | 0.1                  | 6.8%   | 23.8 (19.7, 28.9)                           | <0.001  | 25.8 (51.7, 30.8)                                      | <0.001  | 23.8 (20.0, 28.2)                                      | <0.001  | 23.8 (20.1, 28.2)                                                 | <0.001  |
| Poland          | 115  | 0.5             | 0.1                 | 0.1                  | 2.6%   | 71.7 (62.6, 82.1)                           | <0.001  | 76.4 (67.4, 85.6)                                      | <0.001  | 73.4 (65.0, 83.0)                                      | <0.001  | 73.5 (65.2, 82.9)                                                 | <0.001  |
| Portugal        | 116  | 0.5             | 0.1                 | 0.1                  | 0.9%   | 41.9 (36.6, 48.0)                           | 0.057   | 48.2 (42.5, 54.6)                                      | 0.54    | 46.6 (41.3, 52.7)                                      | 0.89    | 46.5 (41.3, 52.5)                                                 | 0.90    |
| Romania         | 119  | 0.5             | 0.1                 | 0.1                  | 5.1%   | 76.1 (66.4, 87.1)                           | <0.001  | 74.0 (65.4, 83.8)                                      | <0.001  | 67.1 (59.4, 75.8)                                      | <0.001  | 67.2 (59.5, 75.8)                                                 | <0.001  |
| Sweden          | 97   | 0.3             | 0.3                 | 0.3                  | 1.0%   | 43.5 (38.0, 49.8)                           | 0.18    | 49.9 (43.9, 56.6)                                      | 0.96    | 49.1 (43.5, 55.5)                                      | 0.32    | 49.0 (43.5, 55.3)                                                 | 0.32    |
| Slovenia        | 120  | 0.5             | 0.5                 | 0.5                  | 4.2%   | 48.8 (42.6, 55.9)                           | 0.72    | 46.3 (40.8, 52.4)                                      | 0.21    | 40.5 (35.8, 45.7)                                      | 0.03    | 40.7 (36.1, 46.0)                                                 | 0.03    |
| Slovak Republic | 127  | 2               | 0.61                | 0.24                 | 22.0%  | 87.5 (76.4, 100.3)                          | <0.001  | 82.7 (73.0, 93.7)                                      | <0.001  | 72.3 (64.0, 81.7)                                      | <0.001  | 72.0 (63.8, 81.2)                                                 | <0.001  |
| United Kingdom  | 21   | 0.5             | 0.5                 | 0.5                  | 14.3%  | 31.6 (27.6, 36.2)                           | <0.001  | 37.5 (33.0, 42.5)                                      | <0.001  | 35.1 (31.0, 39.6)                                      | <0.001  | 35.2 (31.2, 39.7)                                                 | <0.001  |

Urinary DEHP metabolites: sum of MEHP, 5OH-MEHP and 5oxo-MEHP; DEHP: di(2-ethylhexyl)phthalate; MEHP: mono(2-ethylhexyl)phthalate;

LOQ: limit of quantification; GM: geometric mean; CI: confidence interval.

<sup>a</sup>Adjusted for age, gender and creatinine. <sup>b</sup>Adjusted for age and gender.

**Table S27.** Comparison of mean urinary level of DEHP metabolites between 17 European countries, results in mothers, unadjusted and adjusted data.

| Country         | N    | LOQ MEHP (µg/L) | LOQ 5OH-MEHP (µg/L) | LOQ 5oxo-MEHP (µg/L) | % <LOQ | Urinary DEHP (µg/L) GM (95% CI), unadjusted | p-value | Urinary DEHP (µg/L) GM (95% CI), adjusted <sup>a</sup> | p-value | Urinary DEHP (µg/g creatinine) GM (95% CI), unadjusted | p-value | Urinary DEHP (µg/g creatinine) GM (95% CI), adjusted <sup>b</sup> | p-value |
|-----------------|------|-----------------|---------------------|----------------------|--------|---------------------------------------------|---------|--------------------------------------------------------|---------|--------------------------------------------------------|---------|-------------------------------------------------------------------|---------|
| ALL             | 1800 | 0.3-3.9         | 0.1-9.2             | 0.1-6.2              | 18.4%  | 29.2 (28.1, 30.3)                           | <0.001  | 29.1 (28.1, 30.1)                                      | <0.001  | 26.0 (25.2, 26.9)                                      | <0.001  | 25.9 (25.0, 6.7)                                                  | <0.001  |
| Belgium         | 125  | 0.5             | 0.1                 | 0.1                  | 7.2%   | 21.3 (18.3, 24.8)                           | <0.001  | 21.7 (19.0, 24.8)                                      | <0.001  | 19.0 (16.7, 21.6)                                      | <0.001  | 18.8 (16.5, 21.4)                                                 | <0.001  |
| Switzerland     | 117  | 3.9             | 9.2                 | 6.2                  | 82.1%  | 18.4 (15.8, 21.4)                           | <0.001  | 20.4 (17.8, 23.3)                                      | <0.001  | 19.0 (16.7, 21.6)                                      | <0.001  | 18.7 (16.4, 21.3)                                                 | <0.001  |
| Cyprus          | 59   | 2.6             | 2.5                 | 1.6                  | 42.4%  | 17.7 (14.3, 22.0)                           | <0.001  | 16.8 (13.9, 20.3)                                      | <0.001  | 15.3 (12.7, 18.3)                                      | <0.001  | 15.3 (12.7, 18.3)                                                 | <0.001  |
| Czech Republic  | 117  | 2               | 0.61                | 0.24                 | 23.9%  | 35.9 (30.8, 41.8)                           | 0.006   | 37.3 (32.6, 42.6)                                      | <0.001  | 33.8 (29.7, 38.4)                                      | <0.001  | 33.9 (29.8, 38.6)                                                 | <0.001  |
| Germany         | 116  | 0.5             | 0.2                 | 0.2                  | 15.5%  | 21.5 (18.5, 25.1)                           | <0.001  | 21.1 (18.5, 24.1)                                      | <0.001  | 19.1 (16.8, 21.8)                                      | <0.001  | 18.9 (16.6, 21.5)                                                 | <0.001  |
| Denmark         | 143  | 0.14            | 0.91                | 0.67                 | 8.4%   | 21.7 (18.6, 25.3)                           | <0.001  | 24.0 (21.0, 27.4)                                      | 0.003   | 22.2 (19.5, 25.2)                                      | 0.01    | 21.7 (19.0, 24.7)                                                 | 0.006   |
| Spain           | 118  | 0.5             | 0.2                 | 0.2                  | 0.0%   | 43.7 (37.5, 50.9)                           | <0.001  | 43.4 (38.0, 49.6)                                      | <0.001  | 40.9 (35.9, 46.6)                                      | <0.001  | 40.2 (35.2, 45.8)                                                 | <0.001  |
| Hungary         | 115  | 2               | 0.61                | 0.24                 | 25.2%  | 36.8 (31.5, 42.8)                           | 0.002   | 34.0 (29.7, 38.8)                                      | 0.019   | 29.5 (25.9, 33.6)                                      | 0.049   | 29.8 (26.1, 34.0)                                                 | 0.03    |
| Ireland         | 120  | 1               | 0.5                 | 0.5                  | 10.0%  | 34.2 (29.3, 39.8)                           | 0.036   | 32.3 (28.2, 36.8)                                      | 0.12    | 29.2 (25.7, 33.2)                                      | 0.07    | 29.1 (25.5, 33.1)                                                 | 0.07    |
| Luxembourg      | 56   | 0.5             | 0.1                 | 0.1                  | 13.3%  | 14.0 (11.3, 17.4)                           | <0.001  | 15.9 (13.2, 19.3)                                      | <0.001  | 15.0 (12.5, 18.0)                                      | <0.001  | 14.8 (12.3, 17.8)                                                 | <0.001  |
| Poland          | 119  | 0.5             | 0.1                 | 0.1                  | 0.8%   | 43.1 (37.0, 50.3)                           | <0.001  | 43.9 (38.4, 50.2)                                      | <0.001  | 39.3 (34.5, 44.7)                                      | <0.001  | 39.7 (34.9, 45.2)                                                 | <0.001  |
| Portugal        | 117  | 0.5             | 0.1                 | 0.1                  | 0.0%   | 39.9 (34.2, 46.5)                           | <0.001  | 37.2 (32.6, 42.5)                                      | <0.001  | 32.0 (28.1, 36.5)                                      | <0.001  | 32.1 (28.2, 36.5)                                                 | <0.001  |
| Romania         | 117  | 0.5             | 0.1                 | 0.1                  | 5.1%   | 56.1 (48.2, 65.4)                           | <0.001  | 51.5 (45.0, 58.9)                                      | <0.001  | 43.6 (38.3, 49.7)                                      | <0.001  | 44.4 (39.0, 50.6)                                                 | <0.001  |
| Sweden          | 96   | 0.3             | 0.3                 | 0.3                  | 5.2%   | 26.3 (22.6, 30.7)                           | 0.17    | 28.4 (24.8, 32.4)                                      | 0.78    | 24.9 (21.9, 28.3)                                      | 0.50    | 24.7 (21.7, 28.2)                                                 | 0.49    |
| Slovenia        | 119  | 0.5             | 0.5                 | 0.5                  | 3.4%   | 30.9 (26.6, 36.1)                           | 0.44    | 28.1 (24.6, 32.1)                                      | 0.58    | 24.0 (21.1, 27.3)                                      | 0.22    | 23.8 (20.9, 27.1)                                                 | 0.19    |
| Slovak Republic | 125  | 2               | 0.61                | 0.24                 | 20.0%  | 41.4 (35.5, 48.2)                           | <0.001  | 39.4 (34.5, 45.0)                                      | <0.001  | 33.6 (29.5, 38.3)                                      | <0.001  | 33.8 (29.7, 37.5)                                                 | <0.001  |
| United Kingdom  | 21   | 0.5             | 0.5                 | 0.5                  | 23.8%  | 15.0 (12.9, 17.5)                           | <0.001  | 15.5 (13.5, 17.8)                                      | <0.001  | 14.4 (12.6, 16.3)                                      | <0.001  | 14.0 (12.3, 16.0)                                                 | <0.001  |

Urinary DEHP metabolites: sum of MEHP, 5OH-MEHP and 5oxo-MEHP; DEHP: di(2-ethylhexyl)phthalate; MEHP: mono(2-ethylhexyl)phthalate; LOQ: limit of quantification; GM: geometric mean; CI: confidence interval.

<sup>a</sup>Adjusted for age and creatinine. <sup>b</sup>Adjusted for age.

**Table S28.** Comparison of mean urinary MEP levels between 17 European countries, results in children, unadjusted and adjusted data.

| Country         | N    | LOQ (µg/L) | % <LOQ | Urinary MEP (µg/L) GM (95% CI), unadjusted | p-value | Urinary MEP (µg/L)GM (95% CI), adjusted <sup>a</sup> | p-value | Urinary MEP (µg/g creatinine) GM (95% CI), unadjusted | p-value | Urinary MEP (µg/g creatinine) GM (95% CI), adjusted <sup>b</sup> | p-value |
|-----------------|------|------------|--------|--------------------------------------------|---------|------------------------------------------------------|---------|-------------------------------------------------------|---------|------------------------------------------------------------------|---------|
| ALL             | 1816 | 0.5-11     | 2.0%   | 34.36 (32.78, 36.02)                       | <0.001  | 36.17 (34.50, 37.93)                                 | <0.001  | 33.37 (31.93, 34.88)                                  | <0.001  | 33.29 (31.86, 34.79)                                             | <0.001  |
| Belgium         | 125  | 0.5        | 0.0%   | 26.18 (21.69, 31.62)                       | 0.004   | 26.70 (22.28, 31.99)                                 | <0.001  | 23.39 (19.60, 27.91)                                  | <0.001  | 23.41 (19.63, 27.90)                                             | <0.001  |
| Switzerland     | 119  | 11         | 30.3%  | 18.78 (15.55, 22.68)                       | <0.001  | 19.70 (16.45, 23.59)                                 | <0.001  | 18.06 (15.14, 21.55)                                  | <0.001  | 17.93 (15.04, 21.37)                                             | <0.001  |
| Cyprus          | 60   | 4          | 0.0%   | 38.97 (29.85, 50.88)                       | 0.35    | 41.16 (31.90, 53.11)                                 | 0.31    | 37.25 (29.01, 47.82)                                  | 0.38    | 37.25 (29.05, 47.76)                                             | 0.37    |
| Czech Republic  | 120  | 0.64       | 0.0%   | 31.60 (26.17, 38.15)                       | 0.37    | 34.36 (28.68, 41.15)                                 | 0.56    | 32.20 (26.99, 38.43)                                  | 0.68    | 32.14 (26.96, 38.32)                                             | 0.68    |
| Germany         | 120  | 0.5        | 0.0%   | 22.69 (18.79, 27.40)                       | <0.001  | 23.08 (19.27, 27.65)                                 | <0.001  | 20.62 (17.28, 24.60)                                  | <0.001  | 20.45 (17.15, 24.39)                                             | <0.001  |
| Denmark         | 142  | 0.53       | 0.0%   | 20.13 (16.67, 24.31)                       | <0.001  | 22.13 (18.47, 26.51)                                 | <0.001  | 20.93 (17.54, 24.97)                                  | <0.001  | 21.00 (17.61, 25.04)                                             | <0.001  |
| Spain           | 119  | 0.5        | 0.0%   | 181.9 (150.6, 219.6)                       | <0.001  | 208.3 (173.7, 249.8)                                 | <0.001  | 198.9 (166.7, 237.4)                                  | <0.001  | 198.9 (166.8, 237.1)                                             | <0.001  |
| Hungary         | 117  | 0.64       | 0.0%   | 46.98 (38.91, 56.73)                       | <0.001  | 45.38 (37.90, 54.34)                                 | 0.01    | 41.56 (34.83, 49.59)                                  | 0.019   | 41.55 (34.85, 49.54)                                             | 0.011   |
| Ireland         | 120  | 0.5        | 0.0%   | 41.75 (34.57, 50.41)                       | 0.037   | 42.47 (35.46, 50.85)                                 | 0.07    | 38.66 (32.40, 46.13)                                  | 0.09    | 38.72 (32.47, 46.16)                                             | 0.08    |
| Luxembourg      | 59   | 0.5        | 0.0%   | 24.68 (18.91, 32.22)                       | 0.013   | 26.84 (20.81, 34.61)                                 | 0.019   | 24.60 (19.16, 31.58)                                  | 0.015   | 24.61 (19.19, 31.55)                                             | 0.015   |
| Poland          | 115  | 0.5        | 0.0%   | 43.79 (36.27, 52.88)                       | 0.009   | 46.89 (39.15, 56.16)                                 | 0.003   | 44.86 (37.60, 53.52)                                  | <0.001  | 44.90 (37.66, 53.54)                                             | <0.001  |
| Portugal        | 116  | 0.5        | 0.0%   | 43.27 (35.84, 52.25)                       | 0.013   | 50.17 (41.82, 60.18)                                 | <0.001  | 48.16 (40.36, 57.46)                                  | <0.001  | 48.06 (40.31, 57.29)                                             | <0.001  |
| Romania         | 119  | 0.5        | 0.0%   | 35.90 (29.73, 43.35)                       | 0.64    | 34.83 (29.10, 41.69)                                 | 0.67    | 31.67 (26.54, 37.79)                                  | 0.55    | 31.65 (26.55, 37.73)                                             | 0.56    |
| Sweden          | 97   | 0.3        | 0.0%   | 28.83 (23.87, 34.81)                       | 0.06    | 33.34 (27.77, 40.03)                                 | 0.36    | 32.56 (27.29, 38.85)                                  | 0.78    | 32.49 (27.25, 38.73)                                             | 0.78    |
| Slovenia        | 120  | 0.5        | 0.0%   | 43.22 (35.80, 52.19)                       | 0.014   | 40.17 (33.53, 48.13)                                 | 0.24    | 35.88 (30.07, 42.81)                                  | 0.41    | 35.46 (29.72, 42.30)                                             | 0.47    |
| Slovak Republic | 127  | 0.64       | 0.0%   | 39.64 (32.83, 47.86)                       | 0.12    | 37.53 (31.34, 44.93)                                 | 0.68    | 32.72 (27.42, 39.04)                                  | 0.82    | 32.70 (27.42, 38.98)                                             | 0.08    |
| United Kingdom  | 21   | 0.5        | 0.0%   | 14.33 (11.87, 17.30)                       | <0.001  | 16.95 (14.12, 20.34)                                 | <0.001  | 15.92 (13.34, 18.99)                                  | <0.001  | 15.78 (13.23, 18.82)                                             | <0.001  |

MEP: mono-ethyl phthalate; LOQ: limit of quantification; GM: geometric mean; CI: confidence interval.

<sup>a</sup>Adjusted for age, gender and creatinine. <sup>b</sup>Adjusted for age and gender

**Table S29.** Comparison of mean urinary MEP levels between 17 European countries, results in mothers, unadjusted and adjusted data.

| Country         | N    | LOQ<br>(µg/L) | %<br><LOQ | Urinary MEP<br>(µg/L)<br>GM (95% CI),<br>unadjusted | p-value | Urinary MEP<br>(µg/L)<br>GM (95% CI),<br>adjusted <sup>a</sup> | p-value | Urinary MEP<br>(µg/g creatinine)<br>GM (95% CI),<br>unadjusted | p-value | Urinary MEP<br>(µg/g creatinine)<br>GM (95% CI),<br>adjusted <sup>b</sup> | p-value |
|-----------------|------|---------------|-----------|-----------------------------------------------------|---------|----------------------------------------------------------------|---------|----------------------------------------------------------------|---------|---------------------------------------------------------------------------|---------|
| ALL             | 1800 | 0.5-11        | 4.8%      | 48.20 (45.59, 50.97)                                | <0.001  | 48.09 (45.59, 50.73)                                           | <0.001  | 42.94 (40.75, 45.24)                                           | <0.001  | 42.77 (40.56, 45.11)                                                      | <0.001  |
| Belgium         | 125  | 0.5           | 0.0%      | 36.30 (29.04, 45.38)                                | 0.010   | 37.10 (30.06, 45.77)                                           | 0.012   | 32.39 (26.27, 39.92)                                           | 0.006   | 32.16 (26.06, 39.68)                                                      | 0.012   |
| Switzerland     | 117  | 11            | 25.6%     | 28.13 (22.51, 35.17)                                | <0.001  | 31.18 (25.24, 38.52)                                           | <0.001  | 29.10 (23.60, 35.87)                                           | <0.001  | 28.52 (23.10, 35.21)                                                      | 0.006   |
| Cyprus          | 59   | 4             | 1.7%      | 92.42 (67.41, 126.7)                                | <0.001  | 87.68 (65.21, 117.9)                                           | <0.001  | 79.59 (59.21, 107.0)                                           | <0.001  | 79.68 (59.28, 107.1)                                                      | <0.001  |
| Czech Republic  | 117  | 0.64          | 0.0%      | 56.66 (45.32, 70.82)                                | 0.15    | 59.17 (47.97, 73.00)                                           | 0.046   | 53.28 (43.23, 65.68)                                           | 0.037   | 53.77 (43.59, 66.33)                                                      | 0.027   |
| Germany         | 116  | 0.5           | 0.0%      | 39.41 (31.53, 49.27)                                | 0.07    | 38.55 (31.24, 47.57)                                           | 0.033   | 34.97 (28.37, 43.11)                                           | 0.047   | 34.46 (27.92, 42.51)                                                      | 0.037   |
| Denmark         | 143  | 0.53          | 0.0%      | 33.74 (26.99, 42.18)                                | <0.001  | 37.29 (30.17, 46.08)                                           | 0.015   | 34.43 (27.94, 42.45)                                           | 0.033   | 33.70 (27.28, 41.64)                                                      | 0.022   |
| Spain           | 118  | 0.5           | 0.0%      | 161.1 (128.9, 201.4)                                | <0.001  | 160.0 (129.5, 197.6)                                           | <0.001  | 150.8 (122.4, 185.9)                                           | <0.001  | 148.0 (119.8, 182.8)                                                      | <0.001  |
| Hungary         | 115  | 0.64          | 0.0%      | 55.04 (44.03, 68.80)                                | 0.23    | 50.88 (41.24, 62.78)                                           | 0.59    | 44.15 (35.82, 54.42)                                           | 0.79    | 44.70 (36.24, 55.13)                                                      | 0.67    |
| Ireland         | 120  | 0.5           | 0.0%      | 58.72 (46.98, 73.40)                                | 0.07    | 55.25 (44.80, 68.13)                                           | 0.18    | 50.15 (40.69, 61.82)                                           | 0.13    | 49.91 (40.49, 61.53)                                                      | 0.14    |
| Luxembourg      | 56   | 0.5           | 0.0%      | 31.77 (23.17, 43.56)                                | 0.009   | 36.38 (26.96, 49.08)                                           | 0.06    | 34.11 (25.37, 45.85)                                           | 0.12    | 33.81 (25.10, 45.53)                                                      | 0.11    |
| Poland          | 119  | 0.5           | 0.0%      | 41.66 (33.33, 52.08)                                | 0.19    | 42.52 (34.47, 52.45)                                           | 0.24    | 37.94 (30.78, 46.76)                                           | 0.23    | 38.43 (31.16, 47.40)                                                      | 0.30    |
| Portugal        | 117  | 0.5           | 0.0%      | 59.84 (47.87, 74.80)                                | 0.049   | 55.85 (45.28, 68.90)                                           | 0.15    | 48.05 (38.98, 59.22)                                           | 0.28    | 48.31 (39.18, 59.58)                                                      | 0.24    |
| Romania         | 117  | 0.5           | 0.0%      | 48.03 (38.42, 60.04)                                | 0.97    | 44.23 (35.79, 54.66)                                           | 0.43    | 37.34 (30.29, 46.03)                                           | 0.18    | 38.23 (30.95, 47.23)                                                      | 0.28    |
| Sweden          | 96   | 0.3           | 0.0%      | 43.05 (34.44, 53.81)                                | 0.30    | 46.53 (37.71, 57.42)                                           | 0.75    | 40.69 (33.01, 50.16)                                           | 0.60    | 40.57 (32.90, 50.04)                                                      | 0.61    |
| Slovenia        | 119  | 0.5           | 0.0%      | 51.75 (41.40, 64.69)                                | 0.52    | 46.82 (37.94, 57.77)                                           | 0.80    | 40.17 (32.59, 49.51)                                           | 0.52    | 39.85 (32.31, 49.14)                                                      | 0.49    |
| Slovak Republic | 125  | 0.64          | 0.0%      | 54.81 (43.84, 68.51)                                | 0.24    | 52.21 (42.33, 64.39)                                           | 0.43    | 44.53 (36.12, 54.89)                                           | 0.72    | 44.91 (36.42, 55.37)                                                      | 0.64    |
| United Kingdom  | 21   | 0.5           | 0.0%      | 26.75 (21.40, 33.44)                                | <0.001  | 27.39 (22.11, 33.92)                                           | <0.001  | 25.63 (20.80, 31.60)                                           | <0.001  | 24.79 (20.02, 30.70)                                                      | <0.001  |

MEP: mono-ethyl phthalate; LOQ: limit of quantification; GM: geometric mean; CI: confidence interval.

<sup>a</sup>Adjusted for age and creatinine. <sup>b</sup>Adjusted for age.

**Table S30.** Comparison of mean urinary MBzP levels between 17 European countries, results in children, unadjusted and adjusted data.

| Country         | N    | LOQ (µg/L) | % <LOQ | Urinary MBzP (µg/L) GM (95% CI), unadjusted | p-value | Urinary MBzP (µg/L) GM (95% CI), adjusted <sup>a</sup> | p-value | Urinary MBzP (µg/g creatinine) GM (95% CI), unadjusted | p-value | Urinary MBzP (µg/g creatinine) GM (95% CI), adjusted <sup>b</sup> | p-value |
|-----------------|------|------------|--------|---------------------------------------------|---------|--------------------------------------------------------|---------|--------------------------------------------------------|---------|-------------------------------------------------------------------|---------|
| ALL             | 1816 | 0.2-1.9    | 4.8%   | 7.15 (6.83, 7.48)                           | <0.001  | 7.56 (7.22, 7.91)                                      | <0.001  | 6.94 (6.66, 7.24)                                      | <0.001  | 6.94 (6.66, 7.24)                                                 | <0.001  |
| Belgium         | 125  | 0.2        | 0.0%   | 8.78 (7.33, 10.5)                           | 0.021   | 8.96 (7.54, 10.6)                                      | 0.044   | 7.84 (6.62, 9.29)                                      | 0.15    | 7.83 (6.62, 9.28)                                                 | 0.15    |
| Switzerland     | 119  | 5          | 57.1%  | 4.84 (4.04, 5.79)                           | <0.001  | 5.10 (4.30, 6.06)                                      | <0.001  | 4.65 (3.92, 5.51)                                      | <0.001  | 4.64 (3.92, 5.49)                                                 | <0.001  |
| Cyprus          | 60   | 1.9        | 16.7%  | 3.48 (2.70, 4.49)                           | <0.001  | 3.69 (2.89, 4.70)                                      | <0.001  | 3.33 (2.62, 4.23)                                      | <0.001  | 3.33 (2.62, 4.23)                                                 | <0.001  |
| Czech Republic  | 120  | 1.2        | 0.0%   | 8.32 (6.94, 9.96)                           | 0.09    | 9.06 (7.63, 10.8)                                      | 0.032   | 8.48 (7.15, 10.0)                                      | 0.017   | 8.47 (7.15, 10.0)                                                 | 0.018   |
| Germany         | 120  | 0.2        | 0.0%   | 6.47 (5.40, 7.75)                           | 0.26    | 6.59 (5.54, 7.82)                                      | 0.10    | 5.88 (4.97, 6.97)                                      | 0.048   | 5.82 (4.92, 6.89)                                                 | 0.034   |
| Denmark         | 142  | 1.14       | 2.8%   | 7.21 (6.02, 8.64)                           | 0.92    | 7.95 (6.69, 9.45)                                      | 0.55    | 7.50 (6.33, 8.89)                                      | 0.36    | 7.54 (6.37, 8.93)                                                 | 0.33    |
| Spain           | 119  | 0.2        | 0.0%   | 12.7 (10.6, 15.2)                           | <0.001  | 14.6 (12.2, 17.3)                                      | <0.001  | 13.9 (11.7, 16.5)                                      | <0.001  | 13.9 (11.7, 16.4)                                                 | <0.001  |
| Hungary         | 117  | 1.2        | 0.9%   | 7.57 (6.32, 9.07)                           | 0.52    | 7.32 (6.17, 8.70)                                      | 0.71    | 6.70 (5.65, 7.94)                                      | 0.67    | 6.69 (5.65, 7.92)                                                 | 0.66    |
| Ireland         | 120  | 0.5        | 0.0%   | 5.83 (4.87, 6.98)                           | 0.022   | 5.92 (4.99, 7.03)                                      | 0.004   | 5.40 (4.56, 6.40)                                      | 0.003   | 5.39 (4.55, 6.38)                                                 | 0.002   |
| Luxembourg      | 59   | 0.2        | 0.0%   | 4.75 (3.68, 6.14)                           | <0.001  | 5.18 (4.06, 6.60)                                      | 0.002   | 4.74 (3.73, 6.02)                                      | <0.001  | 4.75 (3.74, 6.03)                                                 | <0.001  |
| Poland          | 115  | 0.5        | 0.9%   | 8.71 (7.27, 10.4)                           | 0.027   | 9.33 (7.86, 11.1)                                      | 0.013   | 8.92 (7.53, 10.6)                                      | 0.003   | 8.93 (7.54, 10.6)                                                 | 0.003   |
| Portugal        | 116  | 0.2        | 0.0%   | 6.98 (5.83, 8.36)                           | 0.79    | 8.11 (6.82, 9.65)                                      | 0.41    | 7.77 (6.56, 9.20)                                      | 0.18    | 7.76 (6.55, 9.18)                                                 | 0.18    |
| Romania         | 119  | 0.2        | 1.7%   | 4.26 (3.55, 5.10)                           | <0.001  | 4.14 (3.49, 4.91)                                      | <0.001  | 3.76 (3.17, 4.45)                                      | <0.001  | 3.76 (3.18, 4.45)                                                 | <0.001  |
| Sweden          | 97   | 0.3        | 0.0%   | 19.9 (16.6, 23.8)                           | <0.001  | 23.1 (19.4, 27.5)                                      | <0.001  | 22.5 (19.0, 26.6)                                      | <0.001  | 22.5 (19.0, 26.6)                                                 | <0.001  |
| Slovenia        | 120  | 0.5        | 0.0%   | 8.34 (6.96, 9.98)                           | 0.09    | 7.95 (6.69, 9.45)                                      | 0.55    | 6.92 (5.84, 8.20)                                      | 0.97    | 7.01 (5.92, 8.31)                                                 | 0.91    |
| Slovak Republic | 127  | 1.2        | 0.8%   | 8.35 (6.97, 10.0)                           | 0.08    | 7.89 (6.65, 9.37)                                      | 0.61    | 6.89 (5.82, 8.17)                                      | 0.93    | 6.86 (5.80, 8.13)                                                 | 0.89    |
| United Kingdom  | 21   | 0.5        | 0.0%   | 3.46 (2.89, 4.14)                           | <0.001  | 4.15 (3.49, 4.94)                                      | <0.001  | 3.84 (3.24, 4.55)                                      | <0.001  | 3.87 (3.26, 4.58)                                                 | <0.001  |

MBzP: mono-benzyl phthalate; LOQ: limit of quantification; GM: geometric mean; CI: confidence interval.

<sup>a</sup>Adjusted for age, gender and creatinine. <sup>b</sup>Adjusted for age and gender.

**Table S31.** Comparison of mean urinary MBzP levels between 17 European countries, results in mothers, unadjusted and adjusted data.

| Country         | N    | LOQ (µg/L) | % <LOQ | Urinary MBzP (µg/L) GM (95% CI), unadjusted | p-value | Urinary MBzP (µg/L) GM (95% CI), adjusted <sup>a</sup> | p-value | Urinary MBzP (µg/g creatinine) GM (95% CI), unadjusted | p-value | Urinary MBzP (µg/g creatinine) GM (95% CI), adjusted <sup>b</sup> | p-value |
|-----------------|------|------------|--------|---------------------------------------------|---------|--------------------------------------------------------|---------|--------------------------------------------------------|---------|-------------------------------------------------------------------|---------|
| ALL             | 1800 | 0.2-5      | 8.2%   | 4.51 (4.31, 4.72)                           | <0.001  | 4.48 (4.30, 4.67)                                      | <0.001  | 4.02 (3.87, 4.18)                                      | <0.001  | 3.98 (3.83, 4.14)                                                 | <0.001  |
| Belgium         | 125  | 0.2        | 0.0%   | 6.47 (5.41, 7.74)                           | <0.001  | 6.54 (5.58, 7.68)                                      | <0.001  | 5.77 (4.94, 6.74)                                      | <0.001  | 5.67 (4.85, 6.62)                                                 | <0.001  |
| Switzerland     | 117  | 5          | 72.6%  | 3.47 (2.90, 4.15)                           | 0.003   | 3.90 (3.32, 4.58)                                      | 0.08    | 3.59 (3.07, 4.19)                                      | 0.14    | 3.55 (3.04, 4.15)                                                 | 0.13    |
| Cyprus          | 59   | 1.9        | 32.2%  | 2.54 (1.97, 3.27)                           | <0.001  | 2.39 (1.91, 2.99)                                      | <0.001  | 2.19 (1.76, 2.73)                                      | <0.001  | 2.18 (1.75, 2.71)                                                 | <0.001  |
| Czech Republic  | 117  | 1.2        | 9.4%   | 4.62 (3.87, 5.53)                           | 0.78    | 4.75 (4.05, 5.57)                                      | 0.46    | 4.35 (3.72, 5.08)                                      | 0.30    | 4.30 (3.68, 5.03)                                                 | 0.31    |
| Germany         | 116  | 0.2        | 0.0%   | 4.55 (3.80, 5.44)                           | 0.93    | 4.46 (3.80, 5.23)                                      | 0.95    | 4.03 (3.45, 4.71)                                      | 0.96    | 3.99 (3.41, 4.66)                                                 | 0.99    |
| Denmark         | 143  | 1.14       | 7.0%   | 4.00 (3.35, 4.79)                           | 0.18    | 4.46 (3.80, 5.24)                                      | 0.96    | 4.09 (3.50, 4.77)                                      | 0.82    | 4.01 (3.43, 4.69)                                                 | 0.92    |
| Spain           | 118  | 0.2        | 0.0%   | 8.53 (7.13, 10.2)                           | <0.001  | 8.45 (7.20, 9.93)                                      | <0.001  | 7.99 (6.84, 9.33)                                      | <0.001  | 7.83 (6.70, 9.16)                                                 | <0.001  |
| Hungary         | 115  | 1.2        | 5.2%   | 4.76 (3.98, 5.70)                           | 0.54    | 4.34 (3.70, 5.09)                                      | 0.69    | 3.82 (3.27, 4.46)                                      | 0.51    | 3.82 (3.27, 4.47)                                                 | 0.59    |
| Ireland         | 120  | 0.5        | 2.5%   | 3.65 (3.05, 4.36)                           | 0.017   | 3.43 (2.92, 4.02)                                      | <0.001  | 3.12 (2.67, 3.64)                                      | <0.001  | 3.10 (2.66, 3.62)                                                 | <0.001  |
| Luxembourg      | 56   | 0.2        | 0.0%   | 3.15 (2.44, 4.06)                           | 0.005   | 3.55 (2.83, 4.46)                                      | 0.042   | 3.38 (2.71, 4.21)                                      | 0.12    | 3.27 (2.62, 4.08)                                                 | 0.07    |
| Poland          | 119  | 0.5        | 0.8%   | 4.49 (3.75, 5.37)                           | 0.95    | 4.55 (3.88, 5.33)                                      | 0.85    | 4.09 (3.50, 4.77)                                      | 0.83    | 4.10 (3.51, 4.79)                                                 | 0.70    |
| Portugal        | 117  | 0.2        | 0.0%   | 6.11 (5.11, 7.31)                           | <0.001  | 5.61 (4.78, 6.58)                                      | 0.004   | 4.91 (4.20, 5.73)                                      | 0.009   | 4.86 (4.17, 5.68)                                                 | 0.009   |
| Romania         | 117  | 0.2        | 2.6%   | 2.78 (2.32, 3.32)                           | <0.001  | 2.49 (2.12, 2.93)                                      | <0.001  | 2.16 (1.85, 2.52)                                      | <0.001  | 2.16 (1.85, 2.53)                                                 | <0.001  |
| Sweden          | 96   | 0.3        | 0.0%   | 12.9 (10.7, 15.4)                           | <0.001  | 13.8 (11.7, 16.2)                                      | <0.001  | 12.1 (10.4, 14.2)                                      | <0.001  | 12.0 (10.2, 14.0)                                                 | <0.001  |
| Slovenia        | 119  | 0.5        | 0.0%   | 4.95 (4.13, 5.92)                           | 0.30    | 4.44 (3.78, 5.21)                                      | 0.90    | 3.84 (3.29, 4.48)                                      | 0.55    | 3.79 (3.25, 4.43)                                                 | 0.52    |
| Slovak Republic | 125  | 1.2        | 4.8%   | 4.70 (3.93, 5.62)                           | 0.65    | 4.41 (3.76, 5.18)                                      | 0.85    | 3.81 (3.27, 4.45)                                      | 0.50    | 3.80 (3.26, 4.44)                                                 | 0.54    |
| United Kingdom  | 21   | 0.5        | 14.3%  | 1.63 (1.36, 1.95)                           | <0.001  | 1.74 (1.48, 2.05)                                      | <0.001  | 1.56 (1.34, 1.82)                                      | <0.001  | 1.57 (1.34, 1.84)                                                 | <0.001  |

MBzP: mono-benzyl phthalate; LOQ: limit of quantification; GM: geometric mean; CI: confidence interval.

<sup>a</sup>Adjusted for age and creatinine. <sup>b</sup>Adjusted for age.

**Table S32.** Comparison of mean urinary MnBP levels between 17 European countries, results in children, unadjusted and adjusted data.

| Country        | N    | LOQ (µg/L) | % <LOQ | Urinary MnBP (µg/L) GM (95% CI), unadjusted | p-value | Urinary MnBP (µg/L) GM (95% CI), adjusted <sup>a</sup> | p-value | Urinary MnBP (µg/g creatinine) GM (95% CI), unadjusted | p-value | Urinary MnBP (µg/g creatinine) GM (95% CI), adjusted <sup>b</sup> | p-value |
|----------------|------|------------|--------|---------------------------------------------|---------|--------------------------------------------------------|---------|--------------------------------------------------------|---------|-------------------------------------------------------------------|---------|
| ALL            | 1355 | 0.5-4.4    | 0.1%   | 34.8 (33.5, 36.2)                           | <0.001  | 36.6 (35.3, 38.0)                                      | <0.001  | 34.0 (32.8, 35.2)                                      | <0.001  | 33.9 (32.8, 35.1)                                                 | <0.001  |
| Belgium        | 125  | 0.5        | 0.0%   | 39.0 (34.1, 44.6)                           | 0.09    | 39.4 (34.9, 44.6)                                      | 0.22    | 34.8 (30.8, 39.3)                                      | 0.68    | 34.8 (30.9, 39.3)                                                 | 0.65    |
| Switzerland    | 119  | 4.4        | 1.7%   | 19.4 (16.9, 22.1)                           | <0.001  | 20.1 (17.8, 22.8)                                      | <0.001  | 18.6 (16.5, 21.0)                                      | <0.001  | 18.4 (16.4, 20.8)                                                 | <0.001  |
| Cyprus         | 60   | 1.6        | 0.0%   | 19.7 (16.3, 23.8)                           | <0.001  | 20.6 (17.3, 24.6)                                      | <0.001  | 18.8 (15.9, 22.4)                                      | <0.001  | 18.8 (15.9, 22.3)                                                 | <0.001  |
| Germany        | 120  | 1          | 0.0%   | 46.1 (40.3, 52.7)                           | <0.001  | 46.4 (41.0, 52.5)                                      | <0.001  | 41.9 (37.1, 47.3)                                      | <0.001  | 41.4 (36.7, 46.6)                                                 | <0.001  |
| Denmark        | 142  | 1.43       | 0.0%   | 30.8 (26.9, 35.3)                           | 0.06    | 33.6 (29.7, 38.1)                                      | 0.15    | 32.0 (28.4, 36.2)                                      | 0.32    | 32.2 (28.6, 36.3)                                                 | 0.37    |
| Spain          | 119  | 1          | 0.0%   | 46.6 (40.7, 53.3)                           | <0.001  | 52.7 (46.5, 59.7)                                      | <0.001  | 51.0 (45.1, 57.5)                                      | <0.001  | 50.9 (45.2, 57.4)                                                 | <0.001  |
| Ireland        | 120  | 1          | 0.0%   | 28.2 (24.6, 32.2)                           | <0.001  | 28.5 (25.2, 32.2)                                      | <0.001  | 26.1 (23.1, 29.5)                                      | <0.001  | 26.1 (23.2, 29.4)                                                 | <0.001  |
| Luxembourg     | 59   | 0.5        | 0.0%   | 26.1 (21.6, 31.6)                           | 0.002   | 28.2 (23.7, 33.6)                                      | 0.003   | 26.0 (21.9, 30.9)                                      | 0.002   | 26.1 (22.0, 30.9)                                                 | 0.002   |
| Poland         | 115  | 0.5        | 0.0%   | 85.1 (74.4, 97.4)                           | <0.001  | 90.4 (80.0, 102)                                       | <0.001  | 87.2 (77.2, 98.4)                                      | <0.001  | 87.3 (77.5, 98.4)                                                 | <0.001  |
| Portugal       | 116  | 0.5        | 0.0%   | 29.1 (25.5, 33.3)                           | 0.007   | 33.3 (29.4, 37.7)                                      | 0.11    | 32.4 (28.7, 36.6)                                      | 0.43    | 32.3 (28.7, 36.4)                                                 | 0.41    |
| Romania        | 119  | 0.5        | 0.0%   | 44.4 (38.8, 50.8)                           | <0.001  | 43.2 (38.2, 48.8)                                      | 0.007   | 39.2 (34.7, 44.2)                                      | 0.015   | 39.2 (34.8, 44.1)                                                 | 0.014   |
| Slovenia       | 120  | 0.5        | 0.0%   | 40.0 (34.9, 45.7)                           | 0.036   | 38.0 (33.5, 42.9)                                      | 0.56    | 33.2 (29.4, 37.5)                                      | 0.69    | 33.4 (29.6, 37.7)                                                 | 0.79    |
| United Kingdom | 21   | 0.5        | 0.0%   | 22.6 (19.8, 25.9)                           | <0.001  | 26.4 (23.3, 29.9)                                      | <0.001  | 25.1 (22.3, 28.4)                                      | <0.001  | 24.9 (22.1, 28.1)                                                 | <0.001  |

MnBP: mono-n-butyl phthalate; LOQ: limit of quantification; GM: geometric mean; CI: confidence interval.

<sup>a</sup>Adjusted for age, gender and creatinine. <sup>b</sup>Adjusted for age and gender.



**Table S33.** Comparison of mean urinary MnBP levels between 17 European countries, results in mothers, unadjusted and adjusted data.

| Country        | N    | LOQ (µg/L) | % <LOQ | Urinary MnBP (µg/L) GM (95% CI), unadjusted | p-value | Urinary MnBP (µg/L) GM (95% CI), adjusted <sup>a</sup> | p-value | Urinary MnBP (µg/g creatinine) GM (95% CI), unadjusted | p-value | Urinary MnBP (µg/g creatinine) GM (95% CI), adjusted <sup>b</sup> | p-value |
|----------------|------|------------|--------|---------------------------------------------|---------|--------------------------------------------------------|---------|--------------------------------------------------------|---------|-------------------------------------------------------------------|---------|
| ALL            | 1347 | 0.5-4.4    | 0.6%   | 23.9 (23.0, 24.9)                           | <0.001  | 23.4 (22.6, 24.2)                                      | <0.001  | 21.5 (20.8, 22.2)                                      | <0.001  | 20.8 (20.1, 21.6)                                                 | <0.001  |
| Belgium        | 125  | 0.5        | 0.0%   | 30.9 (26.8, 35.6)                           | <0.001  | 30.5 (27.1, 34.4)                                      | <0.001  | 27.5 (24.4, 31.0)                                      | <0.001  | 26.5 (23.5, 29.8)                                                 | <0.001  |
| Switzerland    | 117  | 4.4        | 6.8%   | 13.2 (11.4, 15.2)                           | <0.001  | 13.9 (12.3, 15.7)                                      | <0.001  | 13.6 (12.1, 15.3)                                      | <0.001  | 12.7 (11.3, 14.3)                                                 | <0.001  |
| Cyprus         | 59   | 1.6        | 0.0%   | 17.0 (13.9, 20.8)                           | <0.001  | 16.1 (13.6, 19.1)                                      | <0.001  | 14.7 (12.4, 17.5)                                      | <0.001  | 14.6 (12.4, 17.3)                                                 | <0.001  |
| Germany        | 116  | 1          | 0.0%   | 31.5 (27.3, 36.3)                           | <0.001  | 29.7 (26.4, 33.5)                                      | <0.001  | 27.9 (24.8, 31.5)                                      | <0.001  | 26.5 (23.6, 29.8)                                                 | <0.001  |
| Denmark        | 143  | 1.43       | 0.0%   | 20.7 (18.0, 23.9)                           | 0.038   | 21.6 (19.2, 24.4)                                      | 0.19    | 21.2 (18.8, 23.9)                                      | 0.80    | 19.6 (17.4, 22.1)                                                 | 0.28    |
| Spain          | 118  | 1          | 0.0%   | 32.7 (28.4, 37.7)                           | <0.001  | 30.8 (27.3, 34.7)                                      | <0.001  | 30.6 (27.1, 34.5)                                      | <0.001  | 28.5 (25.3, 32.0)                                                 | <0.001  |
| Ireland        | 120  | 1          | 0.0%   | 21.7 (18.8, 25.0)                           | 0.15    | 20.2 (18.0, 22.8)                                      | 0.014   | 18.5 (16.4, 20.9)                                      | 0.011   | 18.2 (16.2, 20.5)                                                 | 0.019   |
| Luxembourg     | 56   | 0.5        | 0.0%   | 16.8 (13.7, 20.5)                           | <0.001  | 18.3 (15.4, 21.7)                                      | 0.004   | 18.0 (15.2, 21.3)                                      | 0.036   | 16.9 (14.3, 20.0)                                                 | 0.013   |
| Poland         | 119  | 0.5        | 0.0%   | 46.0 (40.0, 53.0)                           | <0.001  | 48.2 (42.8, 54.4)                                      | <0.001  | 41.9 (37.2, 47.2)                                      | <0.001  | 43.6 (38.7, 49.0)                                                 | <0.001  |
| Portugal       | 117  | 0.5        | 0.0%   | 23.8 (20.7, 27.4)                           | 0.93    | 22.3 (19.8, 25.1)                                      | 0.42    | 19.1 (17.0, 21.5)                                      | 0.045   | 19.2 (17.1, 21.6)                                                 | 0.15    |
| Romania        | 117  | 0.5        | 0.0%   | 28.2 (24.5, 32.5)                           | 0.018   | 27.1 (24.0, 30.6)                                      | 0.014   | 21.9 (19.5, 24.7)                                      | 0.72    | 23.4 (20.8, 26.3)                                                 | 0.05    |
| Slovenia       | 119  | 0.5        | 0.0%   | 26.9 (23.3, 31.0)                           | 0.09    | 23.8 (21.1, 26.8)                                      | 0.76    | 20.9 (18.5, 23.5)                                      | 0.61    | 20.1 (17.9, 22.7)                                                 | 0.55    |
| United Kingdom | 21   | 0.5        | 0.0%   | 13.5 (11.7, 15.5)                           | <0.001  | 13.1 (11.6, 14.9)                                      | <0.001  | 12.9 (11.4, 14.5)                                      | <0.001  | 11.9 (10.5, 13.4)                                                 | <0.001  |

MnBP: mono-n-butyl phthalate; LOQ: limit of quantification; GM: geometric mean; CI: confidence interval.

<sup>a</sup>Adjusted for age and creatinine. <sup>b</sup>Adjusted for age.

**Table S34.** Comparison of mean urinary MiBP levels between 17 European countries, results in children, unadjusted and adjusted data.

| Country        | N    | LOQ<br>(µg/L) | %<br><LOQ | Urinary MiBP<br>(µg/L)<br>GM (95% CI),<br>unadjusted | p-value | Urinary MiBP<br>(µg/L)<br>GM (95% CI),<br>adjusted <sup>a</sup> | p-value | Urinary MiBP<br>(µg/g creatinine)<br>GM (95% CI),<br>unadjusted | p-value | Urinary MiBP<br>(µg/g creatinine)<br>GM (95% CI),<br>adjusted <sup>b</sup> | p-value |
|----------------|------|---------------|-----------|------------------------------------------------------|---------|-----------------------------------------------------------------|---------|-----------------------------------------------------------------|---------|----------------------------------------------------------------------------|---------|
| ALL            | 1355 | 0.5-4.9       | 0.2%      | 45.42 (43.59, 47.32)                                 | <0.001  | 47.94 (46.07, 49.89)                                            | <0.001  | 44.31 (42.69, 46.00)                                            | <0.001  | 44.21 (42.62, 45.87)                                                       | <0.001  |
| Belgium        | 125  | 0.5           | 0.0%      | 58.16 (50.45, 67.05)                                 | <0.001  | 59.20 (51.88, 67.54)                                            | <0.001  | 51.96 (45.65, 59.13)                                            | 0.01    | 51.98 (45.76, 59.05)                                                       | 0.009   |
| Switzerland    | 119  | 4.9           | 2.5%      | 19.67 (17.07, 22.68)                                 | <0.001  | 20.54 (18.01, 23.41)                                            | <0.001  | 18.92 (16.63, 21.53)                                            | <0.001  | 18.74 (16.50, 21.29)                                                       | <0.001  |
| Cyprus         | 60   | 1.4           | 0.0%      | 49.16 (40.21, 60.11)                                 | 0.43    | 51.75 (42.98, 62.32)                                            | 0.41    | 46.99 (39.13, 56.42)                                            | 0.52    | 46.99 (39.24, 56.26)                                                       | 0.50    |
| Germany        | 120  | 1             | 0.0%      | 40.95 (35.52, 47.21)                                 | 0.14    | 41.40 (36.29, 47.23)                                            | 0.02    | 37.22 (32.70, 42.36)                                            | 0.006   | 36.76 (32.36, 41.75)                                                       | 0.003   |
| Denmark        | 142  | 1.1           | 0.0%      | 56.76 (49.24, 65.43)                                 | <0.001  | 62.22 (54.54, 70.99)                                            | <0.001  | 59.01 (51.85, 67.16)                                            | <0.001  | 59.32 (52.23, 67.38)                                                       | <0.001  |
| Spain          | 119  | 1             | 0.0%      | 56.12 (48.68, 64.70)                                 | 0.002   | 63.83 (55.91, 72.88)                                            | <0.001  | 61.38 (53.93, 69.86)                                            | <0.001  | 61.35 (54.01, 69.69)                                                       | <0.001  |
| Ireland        | 120  | 1             | 0.0%      | 44.67 (38.75, 51.49)                                 | 0.81    | 45.36 (39.78, 51.73)                                            | 0.39    | 41.37 (36.35, 47.08)                                            | 0.28    | 41.41 (36.46, 47.04)                                                       | 0.29    |
| Luxembourg     | 59   | 0.5           | 0.0%      | 34.03 (27.83, 41.61)                                 | 0.004   | 36.88 (30.64, 44.39)                                            | 0.005   | 33.92 (28.25, 40.73)                                            | 0.003   | 33.95 (28.35, 40.65)                                                       | 0.003   |
| Poland         | 115  | 0.5           | 0.0%      | 101.5 (88.03, 117.0)                                 | <0.001  | 108.3 (94.96, 123.5)                                            | <0.001  | 103.9 (91.34, 118.3)                                            | <0.001  | 104.1 (91.64, 118.2)                                                       | <0.001  |
| Portugal       | 116  | 0.5           | 0.0%      | 35.07 (30.42, 40.43)                                 | <0.001  | 40.33 (35.31, 46.06)                                            | 0.007   | 39.03 (34.29, 44.42)                                            | 0.04    | 38.92 (34.26, 44.21)                                                       | 0.04    |
| Romania        | 119  | 0.5           | 0.0%      | 52.60 (45.63, 60.64)                                 | 0.03    | 51.11 (44.84, 58.26)                                            | 0.32    | 46.40 (40.77, 52.81)                                            | 0.46    | 46.38 (40.83, 52.68)                                                       | 0.44    |
| Slovenia       | 120  | 1             | 0.0%      | 58.37 (50.63, 67.29)                                 | <0.001  | 54.98 (48.20, 62.70)                                            | 0.03    | 48.46 (42.58, 55.15)                                            | 0.16    | 48.38 (42.57, 54.99)                                                       | 0.15    |
| United Kingdom | 21   | 1             | 0.0%      | 25.83 (22.41, 29.78)                                 | <0.001  | 30.31 (26.53, 34.64)                                            | <0.001  | 28.70 (25.21, 32.66)                                            | <0.001  | 28.47 (25.06, 32.35)                                                       | <0.001  |

MiBP: mono-iso-butyl phthalate; LOQ: limit of quantification; GM: geometric mean; CI: confidence interval.

<sup>a</sup>Adjusted for age, gender and creatinine. <sup>b</sup>Adjusted for age and gender.

**Table S35.** Comparison of mean urinary MiBP levels between 17 European countries, results in mothers, unadjusted and adjusted data.

| Country        | N    | LOQ (µg/L) | % <LOQ | Urinary MiBP (µg/L) GM (95% CI), unadjusted | p-value | Urinary MiBP (µg/L) GM (95% CI), adjusted <sup>a</sup> | p-value | Urinary MiBP (µg/g creatinine) GM (95% CI), unadjusted | p-value | Urinary MiBP (µg/g creatinine) GM (95% CI), adjusted <sup>b</sup> | p-value |
|----------------|------|------------|--------|---------------------------------------------|---------|--------------------------------------------------------|---------|--------------------------------------------------------|---------|-------------------------------------------------------------------|---------|
| ALL            | 1347 | 0.5-4.9    | 0.6%   | 30.12 (28.92, 31.37)                        | <0.001  | 30.07 (28.99, 31.18)                                   | <0.001  | 27.02 (26.10, 27.96)                                   | <0.001  | 26.74 (25.81, 27.71)                                              | <0.001  |
| Belgium        | 125  | 0.5        | 0.0%   | 38.08 (33.07, 43.84)                        | <0.001  | 38.60 (34.13, 43.65)                                   | <0.001  | 33.97 (30.16, 38.28)                                   | <0.001  | 33.49 (29.71, 37.76)                                              | <0.001  |
| Switzerland    | 117  | 4.9        | 6.8%   | 13.09 (11.37, 15.07)                        | <0.001  | 14.41 (12.73, 16.31)                                   | <0.001  | 13.54 (12.02, 15.25)                                   | <0.001  | 13.26 (11.75, 14.95)                                              | <0.001  |
| Cyprus         | 59   | 1.4        | 0.0%   | 46.01 (37.69, 56.16)                        | <0.001  | 43.70 (36.76, 51.95)                                   | <0.001  | 39.62 (33.47, 46.90)                                   | <0.001  | 39.56 (33.42, 46.81)                                              | <0.001  |
| Germany        | 116  | 1          | 0.0%   | 25.07 (21.78, 28.87)                        | 0.008   | 24.61 (21.76, 27.83)                                   | <0.001  | 22.25 (19.74, 25.06)                                   | <0.001  | 21.87 (19.40, 24.66)                                              | <0.001  |
| Denmark        | 143  | 1.1        | 0.0%   | 37.99 (32.99, 43.74)                        | <0.001  | 41.56 (36.70, 47.06)                                   | <0.001  | 38.77 (34.41, 43.68)                                   | <0.001  | 37.79 (33.48, 42.64)                                              | <0.001  |
| Spain          | 118  | 1          | 0.0%   | 37.42 (32.50, 43.09)                        | 0.002   | 36.97 (32.66, 41.84)                                   | <0.001  | 35.03 (31.09, 39.47)                                   | <0.001  | 34.19 (30.30, 38.58)                                              | <0.001  |
| Ireland        | 120  | 1          | 0.0%   | 27.85 (24.19, 32.07)                        | 0.26    | 26.46 (23.41, 29.91)                                   | 0.03    | 23.79 (21.11, 26.80)                                   | 0.03    | 23.66 (21.00, 26.65)                                              | 0.04    |
| Luxembourg     | 56   | 0.5        | 0.0%   | 18.53 (15.19, 22.62)                        | <0.001  | 21.07 (17.67, 25.12)                                   | <0.001  | 19.90 (16.81, 23.55)                                   | <0.001  | 19.45 (16.41, 23.06)                                              | <0.001  |
| Poland         | 119  | 0.5        | 0.0%   | 52.54 (45.63, 60.49)                        | <0.001  | 53.64 (47.44, 60.64)                                   | <0.001  | 57.84 (42.46, 53.90)                                   | <0.001  | 48.42 (42.96, 54.57)                                              | <0.001  |
| Portugal       | 117  | 0.5        | 0.0%   | 30.21 (26.24, 34.79)                        | 0.96    | 28.40 (25.13, 32.11)                                   | 0.34    | 24.26 (21.53, 27.33)                                   | 0.06    | 24.26 (21.53, 27.34)                                              | 0.10    |
| Romania        | 117  | 0.5        | 0.0%   | 37.57 (32.63, 43.26)                        | <0.001  | 34.66 (30.61, 39.23)                                   | 0.02    | 29.21 (25.93, 32.91)                                   | 0.18    | 29.77 (26.39, 33.59)                                              | 0.07    |
| Slovenia       | 119  | 1          | 0.0%   | 38.11 (33.10, 43.88)                        | <0.001  | 34.87 (30.83, 39.43)                                   | 0.01    | 29.58 (26.25, 33.32)                                   | 0.12    | 29.22 (25.93, 32.93)                                              | 0.13    |
| United Kingdom | 21   | 1          | 0.0%   | 16.98 (14.75, 19.55)                        | <0.001  | 17.57 (15.59, 19.92)                                   | <0.001  | 16.27 (14.44, 18.33)                                   | <0.001  | 15.89 (14.06, 17.96)                                              | <0.001  |

MiBP: mono-iso-butyl phthalate; LOQ: limit of quantification; GM: geometric mean; CI: confidence interval.

<sup>a</sup>Adjusted for age and creatinine. <sup>b</sup>Adjusted for age.
